# Supplementary material for: Right Ventricular Outflow Tract Obstruction in Adults: A Systematic Review and Meta-analysis
Source: PubMed Central journal article supplement — CJC Open. 2021 Apr 9;3(9):1153–68. doi: 10.1016/j.cjco.2021.03.011 (PMC8551422; doi:10.1016/j.cjco.2021.03.011), 2021-04-09
Supplement: mmc11.pdf [file mmc11.pdf]

## Supplemental Material

### Right Ventricle Outflow Tract Obstruction in Adults: A Systematic Review

By Zeng, et al.

#### Table of Contents

|                                                                                                                                                                                                |    |
|------------------------------------------------------------------------------------------------------------------------------------------------------------------------------------------------|----|
| Supplemental Appendix S1. PubMed search query (last accessed August 15 <sup>th</sup> , 2020).....                                                                                              | 2  |
| Supplemental Table S1. Characteristics of retrieved clinical studies in chronologic and alphabetical order .....                                                                               | 3  |
| Supplemental Table S2. Prevalence of RVOTO by detailed etiology (n=291).....                                                                                                                   | 20 |
| Supplemental Table S3. Underlying pathology in non-congenital and non-iatrogenic reported cases of RVOTO (n=174).....                                                                          | 21 |
| Supplemental Table S4. Congenital reported cases of RVOTO (n=61) .....                                                                                                                         | 23 |
| Supplemental Table S5. Iatrogenic reported cases of RVOTO (n=56) .....                                                                                                                         | 24 |
| Supplemental Table S6. Reported prevalence of RVOTO .....                                                                                                                                      | 26 |
| Supplemental Figure S1. Flow diagram result of the search strategy .....                                                                                                                       | 27 |
| Supplemental Appendix S2. Quality Assessment Tool for Observational Cohorts and Cross-Sectional Studies .....                                                                                  | 28 |
| Yilmaz AT, Demirkilic U, Ozal E, Tatar H, Ozturk OY. Aneurysms of the sinus of Valsalva. <i>J Cardiovasc Surg (Torino)</i> . 1997;38:119-124.....                                              | 28 |
| Shimizu M, Kawai H, Yokota Y, Yokoyama M. Echocardiographic assessment of right ventricular obstruction in hypertrophic cardiomyopathy. <i>Circ J</i> . 2003;67:855-860.....                   | 32 |
| Guo HW, Xiong H, Xu JP, Wang XQ, Hu SS. Surgical correction for sinus of valsalva aneurysm with right ventricular outflow tract stenosis. <i>J Card Surg</i> . 2012;27:99-102. ....            | 36 |
| Denault AY, Chaput M, Couture P, Hebert Y, Haddad F, Tardif JC. Dynamic right ventricular outflow tract obstruction in cardiac surgery. <i>J Thorac Cardiovasc Surg</i> . 2006;132:43-49. .... | 40 |
| MOOSE (Meta-analyses Of Observational Studies in Epidemiology) Checklist .....                                                                                                                 | 44 |
| References .....                                                                                                                                                                               | 47 |

**Supplemental Appendix S1. PubMed search query (last accessed August 15<sup>th</sup>, 2020)**

**Advanced Search**

((("RVOTO"[All Fields] OR ("ventricular outflow obstruction/surgery"[MeSH Major Topic] AND "right"[Title/Abstract])) OR (((("right ventricular outflow"[Title/Abstract] OR "right ventricle outflow"[Title/Abstract]) AND (("tract"[All Fields] OR "tract s"[All Fields]) OR "tracts"[All Fields])) AND (((("constriction, pathologic"[MeSH Terms] OR ("constriction"[All Fields] AND "pathologic"[All Fields])) OR "pathologic constriction"[All Fields]) OR "stenosi"[All Fields]) OR "stenosis"[All Fields]) OR (((("obstruct"[All Fields] OR "obstructed"[All Fields]) OR "obstructing"[All Fields]) OR "obstruction"[All Fields]) OR "obstructions"[All Fields]) OR "obstructive"[All Fields]) OR "obstructs"[All Fields]))) AND (((((((("thoracic surgery"[MeSH Terms] OR ("thoracic"[All Fields] AND "surgery"[All Fields])) OR "thoracic surgery"[All Fields]) OR ("cardiac"[All Fields] AND "surgery"[All Fields])) OR "cardiac surgery"[All Fields]) OR "cardiac surgical procedures"[MeSH Terms]) OR (("cardiac"[All Fields] AND "surgical"[All Fields]) AND "procedures"[All Fields])) OR "cardiac surgical procedures"[All Fields]) OR ("cardiac"[All Fields] AND "surgery"[All Fields]))) AND (((("adult"[MeSH Terms] OR "adult"[All Fields]) OR "adults"[All Fields]) OR "adult s"[All Fields]) AND (English[lang] OR French[lang]))

**Supplemental Table S1. Characteristics of retrieved clinical studies in chronologic and alphabetical order**

| First Authors                              | Methodology | n       | Results                                                                                                                                                                                                      | Mechanism |
|--------------------------------------------|-------------|---------|--------------------------------------------------------------------------------------------------------------------------------------------------------------------------------------------------------------|-----------|
| Doohden et al. (1964) <sup>15</sup>        | CR          | 1       | RVOTO caused by cardiac myxoma                                                                                                                                                                               | IM        |
| Goldstein and Mahoney (1966) <sup>16</sup> | CR          | 1       | RVOTO caused by a RV fibrosarcoma                                                                                                                                                                            | IM        |
| Kiser et al. (1968) <sup>17</sup>          | CS          | 2       | 2 cases of RVOTO in patients with dextrocardia and double-outlet right ventricle                                                                                                                             | IMC       |
| Rawls et al. (1968) <sup>18</sup>          | CR          | 1       | RVOTO caused by a myocardial abscess in a tuberculosis patient                                                                                                                                               | IM        |
| McLoughlin (1970) <sup>19</sup>            | CR          | 1       | RVOTO caused by metastatic bronchogenic carcinoma                                                                                                                                                            | EM        |
| Hubbard and Neil (1971) <sup>20</sup>      | CR          | 1       | RVOTO caused by a myxoma of the RV                                                                                                                                                                           | IM        |
| Kerber et al. (1972) <sup>21</sup>         | CR          | 1       | RVOTO caused by a sinus of Valsalva aneurysm                                                                                                                                                                 | EM        |
| Merin et al. (1972) <sup>22</sup>          | CR          | 1       | RVOTO in a patient with infundibular pulmonary stenosis                                                                                                                                                      | IMC       |
| Gordon et al. (1973) <sup>23</sup>         | CR          | 1       | RVOTO caused by a metastatic renal carcinoma                                                                                                                                                                 | EM        |
| Zager et al. (1973) <sup>24</sup>          | CR          | 1       | RVOTO caused by a myxoma of the RV                                                                                                                                                                           | IM        |
| Kleinfeld et al. (1976) <sup>25</sup>      | CR          | 1       | RVOTO due to subpulmonic stenosis in a patient with situs inversus totalis                                                                                                                                   | IMC       |
| Shmookler et al. (1977) <sup>26</sup>      | CS and RS   | 2<br>9r | RVOTO caused by primary sarcoma of the pulmonary trunk<br>In retrospective study 9/35 had primary pulmonary artery sarcoma that extended into the RVOT but not mentioned if this was a source of obstruction | IM        |

|                                               |    |   |                                                                     |    |
|-----------------------------------------------|----|---|---------------------------------------------------------------------|----|
| Griffith and Myers<br>(1978) <sup>27</sup>    | CR | 1 | RVOTO caused by metastasis of primary ovarian tumor                 | EM |
| Betancourt et al. (1979) <sup>28</sup>        | CR | 1 | RVOTO caused by a schwannoma in the RVOT                            | IM |
| Birmingham and Peretz<br>(1979) <sup>29</sup> | CR | 1 | RVOTO caused by a metastatic carcinoma from the colon               | EM |
| Silvestre et al. (1979) <sup>30</sup>         | CR | 1 | RVOTO due to an interventricular septum aneurysm                    | IM |
| Hada et al. (1980) <sup>31</sup>              | CR | 1 | RVOTO caused by right ventricle myxoma blocking RVOT during systole | ID |
| Steffens et al. (1980) <sup>32</sup>          | CR | 1 | RVOTO caused by a metastatic hepatocellular tumor                   | EM |
| Ceretto et al. (1981) <sup>33</sup>           | CR | 1 | RVOTO caused by a RV mesenchymoma                                   | IM |
| Upward et al. (1983) <sup>34</sup>            | CR | 1 | RVOTO caused by pericardial abscess                                 | EM |
| Ellis et al. (1984) <sup>35</sup>             | CR | 1 | RVOTO caused by a sinus of Valsalva aneurysm                        | EM |
| Lo et al. (1984) <sup>36</sup>                | CR | 1 | RVOTO caused by ectopic thyroid tissue in the heart                 | EM |
| Norell et al. (1984) <sup>37</sup>            | CR | 1 | RVOTO caused by metastasis of primary colonic carcinoma             | EM |
| Przybojewski (1984) <sup>38</sup>             | CR | 1 | RVOTO caused by suspected echinococcal hydatid cyst in RV           | EM |
| Warnes et al. (1984) <sup>39</sup>            | CR | 1 | RVOTO caused by a sinus of Valsalva aneurysm                        | EM |
| Come et al. (1985) <sup>40</sup>              | CR | 1 | RVOTO caused by extrinsic compression of immunoblastic sarcoma      | EM |
| Desai et al. (1985) <sup>41</sup>             | CR | 1 | RVOTO caused by a sinus of Valsalva aneurysm                        | EM |
| Nishimura et al. (1985) <sup>42</sup>         | CR | 1 | RVOTO caused by constrictive pericardial disease                    | EM |
| Shemin et al. (1985) <sup>43</sup>            | CR | 1 | RVOTO caused by an ectopic thyroid tumor in the heart               | EM |

|                                         |    |   |                                                                                          |       |
|-----------------------------------------|----|---|------------------------------------------------------------------------------------------|-------|
| Antonelli et al. (1986) <sup>44</sup>   | CR | 1 | RVOTO caused by a hydatid cyst on the interventricular septum                            | EM    |
| Hara et al. (1986) <sup>45</sup>        | CR | 1 | RVOTO caused by metastatic undifferentiated thyroid tumor                                | EM    |
| Kiefaber et al. (1986) <sup>46</sup>    | CR | 1 | RVOTO caused by an aneurysm of the sinus of Valsalva                                     | EM    |
| Talley et al. (1986) <sup>47</sup>      | CR | 1 | RVOTO caused by leiomyosarcoma of the posterior RVOT wall                                | IM    |
| Velebit et al. (1986) <sup>48</sup>     | CR | 1 | RVOTO following radiation therapy which caused fibrosis of the pericardium               | EM Ia |
| Emmot et al. (1987) <sup>49</sup>       | CR | 1 | RVOTO caused by metastatic melanoma                                                      | EM    |
| Grigg et al. (1987) <sup>50</sup>       | CR | 1 | RVOTO caused by an ectopic thyroid tumor in the heart                                    | EM    |
| Stierle et al (1987) <sup>51</sup>      | CS | 4 | RVOTO caused by hypertrophic cardiomyopathy                                              | IMC   |
| Bartels et al. (1988) <sup>52</sup>     | CR | 1 | RVOTO caused by a metastatic liposarcoma                                                 | EM    |
| Vallance et al. (1988) <sup>53</sup>    | CR | 1 | RVOTO due to localized pericardial constriction caused by tuberculosis                   | IM    |
| Israeli et al. (1989) <sup>54</sup>     | CS | 3 | RVOTO caused by extracardiac tumor compression (2 due to lymphoma and 1 due to seminoma) | EM    |
| Fremes et al. (1990) <sup>55</sup>      | CR | 1 | RVOTO following a single lung transplantation                                            | ID Ia |
| Haraphongse et al. (1990) <sup>56</sup> | CR | 1 | RVOTO caused by a sinus of Valsalva aneurysm                                             | EM    |
| Kamlow et al. (1991) <sup>57</sup>      | CR | 1 | RVOTO caused by a metastatic histiocytoma from the thigh                                 | EM    |
| Reiss et al. (1991) <sup>58</sup>       | CR | 1 | RVOTO caused by a RV hemangioma                                                          | IM    |

|                                         |    |   |                                                                                                                   |      |
|-----------------------------------------|----|---|-------------------------------------------------------------------------------------------------------------------|------|
| Labib et al. (1992) <sup>59</sup>       | CS | 3 | 3 cases of RVOTO caused by metastatic adenocarcinoma, 1 from the colon, 1 from the pancreas and 1 from the breast | EM   |
| Agrawal et al. (1993) <sup>60</sup>     | CS | 2 | 2 cases of RVOTO caused by an aneurysm of sinus of Valsalva                                                       | EM   |
| Gorcsan et al. (1993) <sup>61</sup>     | CR | 1 | RVOTO following lung transplantation                                                                              | ID1a |
| Carroll et al. (1994) <sup>62</sup>     | CR | 1 | RVOTO from metastatic renal cell carcinoma                                                                        | EM   |
| Ignaszewski et al. (1994) <sup>63</sup> | CR | 1 | RVOTO caused by an aneurysm of the membranous ventricular septum                                                  | IM   |
| Mukadam et al. (1994) <sup>64</sup>     | CR | 1 | RVOTO caused by a myxoma of the RV                                                                                | IM   |
| Ritchie et al. (1994) <sup>65</sup>     | CR | 1 | RVOTO following a single lung transplantation                                                                     | ID1a |
| Tardif et al. (1994) <sup>66</sup>      | CR | 1 | RVOTO caused by an external compression by a post-operative mediastinal hematoma                                  | EM1a |
| Kroshus et al. (1995) <sup>67</sup>     | CS | 2 | 2 cases of RVOTO following lung transplantation                                                                   | ID1a |
| Calderon et al. (1996) <sup>68</sup>    | CR | 1 | RVOTO caused by cardiac angiosarcoma of the RV                                                                    | IM   |
| Kasprzak et al. (1996) <sup>69</sup>    | CR | 1 | RVOTO caused by a metastatic follicular carcinoma of the thyroid                                                  | EM   |
| Kirshbom et al. (1996) <sup>70</sup>    | CR | 1 | RVOTO after bilateral lung transplantation                                                                        | ID1a |
| Soejima et al. (1996) <sup>71</sup>     | CR | 1 | RVOTO caused by a myxoma of the RV                                                                                | IM   |
| Balkin and Imoto (1997) <sup>72</sup>   | CR | 1 | RVOTO caused by soft tissue sarcoma extension from RV                                                             | IM   |
| Henderson et al. (1997) <sup>73</sup>   | CR | 1 | RVOTO caused by a neurofibroma in the RV                                                                          | IM   |
| Ng and Olak (1997) <sup>74</sup>        | CR | 1 | RVOTO caused by pericardial necrotic mesothelial cyst                                                             | EM   |
| Sebastian et al. (1997) <sup>75</sup>   | CR | 1 | RVOTO caused by pseudoaneurysm of a grafted coronary artery                                                       | EM1a |

|                                        |                                                                                                             |   |                                                                                                    |      |
|----------------------------------------|-------------------------------------------------------------------------------------------------------------|---|----------------------------------------------------------------------------------------------------|------|
| Yilmaz et al. (1997) <sup>76</sup>     | RS<br>-File review of patients who had an aneurysm of the sinus of Valsalva<br>-Cases between 1980 and 1994 | 1 | 1/9 of patients had a concurrent RVOTO with sinus of Valsalva aneurysm                             | EM   |
| Esaki et al. (1998) <sup>77</sup>      | CR                                                                                                          | 1 | RVOTO caused by a leiomyosarcoma of the RV                                                         | IM   |
| Sugi et al. (1998) <sup>78</sup>       | CR                                                                                                          | 1 | RVOTO caused by a compression of the RVTO from behind by the aorta following a right pneumonectomy | EMIa |
| Wankmuller et al. (1998) <sup>79</sup> | CR                                                                                                          | 1 | RVOTO caused by metastasis of fibrous histiocytoma from breast                                     | EM   |
| Halcox, J. P. J. (1999) <sup>80</sup>  | CR                                                                                                          | 1 | RVOTO caused by non-Hodgkin lymphoma compression                                                   | EM   |
| Marques et al. (1999) <sup>81</sup>    | CR                                                                                                          | 1 | RVOTO caused by a sinus of Valsalva aneurysm                                                       | EM   |
| Van Camp et al. (1999) <sup>82</sup>   | CR                                                                                                          | 1 | RVOTO due to external compression by a pseudoaneurysm of an aortic graft                           | EMIa |
| Beaver et al. (2000) <sup>83</sup>     | CR                                                                                                          | 1 | RVOTO caused by primary cardiac fibrosarcoma                                                       | IM   |
| Casanova et al. (2000) <sup>84</sup>   | CR                                                                                                          | 1 | RVOTO caused by an ectopic thyroid tissue in the RVOT                                              | EM   |
| Gopal et al. (2000) <sup>85</sup>      | CR                                                                                                          | 1 | RVOTO caused by a myxoma of the RV                                                                 | IM   |
| Kann et al. (2000) <sup>86</sup>       | CR                                                                                                          | 1 | RVOTO caused by a RVOT hemangioma                                                                  | IM   |
| Kono et al. (2000) <sup>87</sup>       | CR                                                                                                          | 1 | RVOTO caused by a leiomyosarcoma of the RV                                                         | IM   |
| McElhinney et al. (2000) <sup>88</sup> | CS                                                                                                          | 3 | RVOTO secondary to double chambered right ventricle                                                | IMC  |

|                                               |                                          |   |                                                                        |      |
|-----------------------------------------------|------------------------------------------|---|------------------------------------------------------------------------|------|
| Murakawa et al. (2000) <sup>89</sup>          | CR                                       | 1 | RVOTO caused by metastatic hepatocellular carcinoma                    | EM   |
| Zakynthinos et al (2000) <sup>90</sup>        | CR                                       | 1 | RVOTO caused by extrinsic compression by non-small cell lung carcinoma | EM   |
| Hayashi et al. (2001) <sup>91</sup>           | CR                                       | 1 | RVOTO caused by biventricular hypertrophic cardiomyopathy              | IMC  |
| Katoh et al. (2001) <sup>92</sup>             | CR                                       | 1 | RVOTO caused by hypertrophic cardiomyopathy                            | IMC  |
| Krishnamoorthy and Desai (2001) <sup>93</sup> | CR                                       | 1 | RVOTO caused by a myxoma of the RV                                     | IM   |
| Willaert et al. (2001) <sup>94</sup>          | CR                                       | 1 | RVOTO caused by a leiomyosarcoma of the RV                             | IM   |
| Agarwal et al. (2002) <sup>95</sup>           | CR                                       | 1 | RVOTO caused by a pulmonary artery aneurysm                            | EM   |
| Doshi et al. (2002) <sup>96</sup>             | CR                                       | 1 | RVOTO due to hypertrophic cardiomyopathy                               | IMC  |
| Gersak et al. (2002) <sup>97</sup>            | CR                                       | 1 | RVOTO caused by metastatic choriocarcinoma                             | EM   |
| Youn et al. (2002) <sup>98</sup>              | CR                                       | 1 | RVOTO caused by extended metastasis from esophageal cancer             | EM   |
| Denault et al. (2003) <sup>99</sup>           | CR                                       | 1 | RVOTO caused by post-surgical thoracic tamponade                       | EMIa |
| Mohanakrishnan et al. (2003) <sup>100</sup>   | CR                                       | 1 | RVOTO caused by a sinus of Valsalva aneurysm                           | EM   |
| Paraskevaidis et al. (2003) <sup>101</sup>    | CR                                       | 1 | RVOTO caused by a myxoma of the RV                                     | IM   |
| Shimizu et al. (2003) <sup>102</sup>          | -RS<br>-Review of Doppler evaluations of | 9 | 9/91 patients had hypertrophic cardiomyopathy causing RVOTO            | IMC  |



|                                             | patients with hypertrophic cardiomyopathy |   |                                                                                                                                          |      |
|---------------------------------------------|-------------------------------------------|---|------------------------------------------------------------------------------------------------------------------------------------------|------|
| Thankachen et al. (2003) <sup>103</sup>     | CR                                        | 1 | RVOTO caused by a sinus of Valsalva aneurysm                                                                                             | EM   |
| Yamada et al. (2003) <sup>104</sup>         | CS                                        | 2 | 2 cases of RVOTO: one caused by a fibrous histiocytoma, one by a leiomyosarcoma                                                          | IM   |
| Anbarasu et al. (2004) <sup>105</sup>       | CR                                        | 1 | RVOTO caused by an endomyocardial fibrosis of the RV                                                                                     | IM   |
| Baweja et al. (2004) <sup>106</sup>         | CR                                        | 1 | RVOTO caused by ventricular septal aneurysm                                                                                              | ED   |
| Gunes et al (2004) <sup>107</sup>           | CR                                        | 1 | RVOTO caused by large aneurysm extending from perimembranous septum to RVOT                                                              | EM   |
| Miyaji et al. (2004) <sup>108</sup>         | CR                                        | 1 | RVOTO following lung transplantation                                                                                                     | ID1a |
| Rastan et al. (2004) <sup>109</sup>         | CR                                        | 1 | RVOTO caused by a cardiac leiomyosarcoma                                                                                                 | IM   |
| Sharda et al. (2004) <sup>110</sup>         | CR                                        | 1 | RVOTO caused by a sinus of Valsalva aneurysm                                                                                             | EM   |
| Totaro et al. (2004) <sup>111</sup>         | CR                                        | 1 | RVOTO caused by an angiosarcoma in the pulmonary trunk                                                                                   | EM   |
| Brestas et al. (2005) <sup>112</sup>        | CR                                        | 1 | RVOTO caused by a myxoma of the RV                                                                                                       | IM   |
| Iba et al. (2005) <sup>113</sup>            | CR                                        | 1 | RVOTO caused by a cardiac hemangioma                                                                                                     | IM   |
| Ichinose et al. (2005) <sup>114</sup>       | CR                                        | 1 | RVOTO due to fibrous thickening of the endocardium and subendocardium 24 years after mediastinal radiotherapy for non-Hodgkin's lymphoma | IMIa |
| Ishikawa et al. (2005) <sup>115</sup>       | CR                                        | 1 | RVOTO caused by a primary cardiac leiomyosarcoma                                                                                         | IM   |
| Karagounis and Sarsam (2005) <sup>116</sup> | CR                                        | 1 | RVOTO caused by a myxoma of the RV                                                                                                       | IM   |

|                                          |                                                                                                                                              |          |                                                                                                                    |      |
|------------------------------------------|----------------------------------------------------------------------------------------------------------------------------------------------|----------|--------------------------------------------------------------------------------------------------------------------|------|
| Prabhakar et al. (2005) <sup>117</sup>   | CR                                                                                                                                           | 1        | RVOTO due to thrombus formed in the RV of a patient with antiphospholipid syndrome                                 | IM   |
| Atik et al. (2006) <sup>118</sup>        | CR                                                                                                                                           | 1        | RVOTO caused by a metastatic renal cell carcinoma                                                                  | EM   |
| Bhavani et al. (2006) <sup>119</sup>     | CR                                                                                                                                           | 1        | RVOTO caused by an endocarditis of the pulmonary valve following an infection of the sternal suture                | EMIa |
| Chiu et al. (2006) <sup>120</sup>        | CS                                                                                                                                           | 2        | 2 cases of RVOTO following heterotopic heart transplantation: caused by a stenosis of the pulmonary artery conduit | EMIa |
| Daccarett et al. (2006) <sup>121</sup>   | CR                                                                                                                                           | 1        | RVOTO caused by a pulmonary valve fibroelastoma                                                                    | IM   |
| Denault et al. (2006) <sup>122</sup>     | RS & PS<br>-File review of patients who had a TEE<br>-Cohort between 2002 and 2004<br>-Prospective confirmatory cohort between 2004 and 2005 | 6r<br>5p | -6/670 in the retrospective group had a RVOTO<br>-5/130 in the prospective group had a RVOTO                       | IDIa |
| Kholeif et al. (2006) <sup>123</sup>     | CR                                                                                                                                           | 1        | RVOTO caused by an aneurysm of the main pulmonary artery                                                           | EM   |
| May et al. (2006) <sup>124</sup>         | CR                                                                                                                                           | 1        | RVOTO caused by metastatic yolk sac tumor                                                                          | EM   |
| Rosenberger et al. (2006) <sup>125</sup> | CR                                                                                                                                           | 1        | RVOTO caused by a sinus of Valsalva aneurysm                                                                       | EM   |

|                                              |    |   |                                                                                                                      |      |
|----------------------------------------------|----|---|----------------------------------------------------------------------------------------------------------------------|------|
| Bouzas-Mosquera et al. (2007) <sup>126</sup> | CR | 1 | RVOTO caused by a rhabdomyosarcoma                                                                                   | IM   |
| Gelfand et al. (2007) <sup>127</sup>         | CR | 1 | RVOTO caused by sinus of Valsalva aneurysm                                                                           | EM   |
| Krecki et al (2007) <sup>128</sup>           | CR | 1 | RVOTO caused by hypertrophic cardiomyopathy                                                                          | IMC  |
| Murakami et al. (2007) <sup>129</sup>        | CR | 1 | RVOTO caused by metastasis of transitional cell carcinoma                                                            | EM   |
| Ozbek et al. (2007) <sup>130</sup>           | CR | 1 | RVOTO caused by sarcoma of the pulmonary artery with extension to the pulmonic valve and RV                          | IM   |
| Sayin et al. (2007) <sup>131</sup>           | CR | 1 | RVOTO caused by a RV myxoma                                                                                          | IM   |
| Aktoz et al. (2008) <sup>132</sup>           | CR | 1 | RVOTO caused by a cardiac rhabdomyoma                                                                                | IM   |
| Butz et al. (2008) <sup>133</sup>            | CR | 1 | RVOTO caused by a biventricular hypertrophic cardiomyopathy                                                          | IMC  |
| Coskun et al. (2008) <sup>134</sup>          | CS | 1 | RVOTO in a patient with recently repaired tetralogy of Fallot: high grade pulmonary valve stenosis and insufficiency | EDIa |
| Goksel et al. (2008) <sup>135</sup>          | CR | 1 | RVOTO caused by a RVOT aneurysm                                                                                      | IM   |
| Nishida et al. (2008) <sup>136</sup>         | CR | 1 | RVOTO caused by a sinus of Valsalva aneurysm                                                                         | EM   |
| Omura et al. (2008) <sup>137</sup>           | CR | 1 | RVOTO caused by a sarcoma of the pulmonary artery                                                                    | EM   |
| Rigatelli et al. (2008) <sup>138</sup>       | CR | 1 | RVOTO post Konno procedure (autograft of the aortic valve and dilation of the RVOT)                                  | EMIa |
| Yang et al. (2008) <sup>139</sup>            | CR | 1 | RVOTO caused by a sinus of Valsalva aneurysm                                                                         | EM   |
| Agarwal et al. (2009) <sup>140</sup>         | CR | 1 | RVOTO caused by a hydatid cyst in the RVOT                                                                           | EM   |
| Bijulal et al.(2009) <sup>141</sup>          | CR | 1 | RVOTO caused by membranous septal aneurysm in a patient with a double outlet RV                                      | IM   |

|                                       |    |   |                                                                                                               |      |
|---------------------------------------|----|---|---------------------------------------------------------------------------------------------------------------|------|
| Chen et al. (2009) <sup>142</sup>     | CR | 1 | RVOTO after bilateral lung transplantation                                                                    | IDiA |
| Chue et al. (2009) <sup>143</sup>     | CR | 1 | RVOTO due to compression by an infected thrombus during pregnancy following Rastelli procedure*               | IMIa |
| Farand et al. (2009) <sup>144</sup>   | CR | 1 | RVOTO caused by a sinus of Valsalva aneurysm                                                                  | EM   |
| Lee et al. (2009) <sup>145</sup>      | CR | 1 | RVOTO caused by primary pleomorphic leiomyosarcoma of the RV                                                  | IM   |
| Martin et al. (2009) <sup>146</sup>   | CR | 1 | RVOTO due to infundibular pulmonary stenosis secondary to hypertrophied muscle bundles                        | IMC  |
| Ozer et al. (2009) <sup>147</sup>     | CR | 1 | RVOTO due to external compression by a mediastinal nodular sclerosing Hodgkin's lymphoma                      | EM   |
| Avci et al. (2010) <sup>148</sup>     | CR | 1 | RVOTO caused by a sinus of Valsalva aneurysm                                                                  | EM   |
| Ivanovic et al. (2010) <sup>149</sup> | CR | 1 | RVOTO caused by a cardiac myxoma                                                                              | IM   |
| Khouzam et al. (2010) <sup>150</sup>  | CR | 1 | RVOTO caused by a thrombus formed in the RVOT of a patient with Ebstein's malformation and tricuspid stenosis | IMC  |
| Lee et al. (2010) <sup>151</sup>      | CR | 1 | RVOTO caused by an accessory tricuspid valve                                                                  | IMC  |
| Recupero et al. (2009) <sup>152</sup> | CR | 1 | RVOTO caused by hypertrophic cardiomyopathy                                                                   | IMC  |
| Rosu et al. (2010) <sup>153</sup>     | CR | 1 | RVOTO caused by a sinus of Valsalva aneurysm                                                                  | EM   |
| Takigawa et al. (2010) <sup>154</sup> | CR | 1 | RVOTO caused by congenital infundibular pulmonary stenosis                                                    | IMC  |
| Vida et al. (2010) <sup>155</sup>     | CR | 1 | RVOTO caused by a stenotic RVOT homograft                                                                     | IMIa |
| Chaudhry et al. (2011) <sup>156</sup> | CR | 1 | RVOTO caused by metastatic B-cell lymphoma of the thymus                                                      | EM   |

|                                          |                                                                                                 |    |                                                                                                                                                                                                                                                                                           |      |
|------------------------------------------|-------------------------------------------------------------------------------------------------|----|-------------------------------------------------------------------------------------------------------------------------------------------------------------------------------------------------------------------------------------------------------------------------------------------|------|
| Chen et al. (2011) <sup>157</sup>        | CR                                                                                              | 1  | RVOTO secondary to membranous ventricular septal aneurysm                                                                                                                                                                                                                                 | IM   |
| Darwazah et al. (2011) <sup>158</sup>    | CS                                                                                              | 2  | 2 cases of RVOTO caused by an adult presentation of double-chambered RV                                                                                                                                                                                                                   | IMC  |
| Gajjar et al. (2011) <sup>159</sup>      | CR                                                                                              | 1  | RVOTO caused by a ventricular myxoma                                                                                                                                                                                                                                                      | IM   |
| Garg et al. (2011) <sup>160</sup>        | CR                                                                                              | 1  | RVOTO caused by a cardiac metastasis of a phyllodes tumor                                                                                                                                                                                                                                 | EM   |
| Shah et al. (2011) <sup>161</sup>        | CR                                                                                              | 1  | RVOTO caused by pulmonary intimal sarcoma                                                                                                                                                                                                                                                 | EM   |
| Tsang and Cheng (2011) <sup>162</sup>    | CR                                                                                              | 1  | RVOTO caused by a myxoma of the tricuspid valve                                                                                                                                                                                                                                           | IM   |
| Gil-Jaurena et al. (2012) <sup>163</sup> | CS                                                                                              | 2  | 2 cases of RVOTO in adults with uncorrected tetralogy of Fallot                                                                                                                                                                                                                           | IMC  |
| Guo et al. (2012) <sup>164</sup>         | -RS<br>-File review of patients undergoing surgery for correction of sinus of Valsalva aneurysm | 11 | 11/222 patients had pre-operative RVOTO, with 2 caused by double chambered right ventricle and 9 caused by abnormal hypertrophic muscle band, concomitantly existing with sinus of Valsalva aneurysm<br><br>2 patients were excluded from total of 13 due to being less than 18 years old | IMC  |
| Matsushita et al. (2012) <sup>165</sup>  | CR                                                                                              | 1  | RVOTO by a medical patch in the RV                                                                                                                                                                                                                                                        | IMIa |
| Obert et al. (2012) <sup>166</sup>       | CR                                                                                              | 1  | RVOTO caused by fibrous band compressing the anterior wall of the RA and RV following Nuss procedure*                                                                                                                                                                                     | EMIa |

|                                                  |    |   |                                                                                                         |      |
|--------------------------------------------------|----|---|---------------------------------------------------------------------------------------------------------|------|
| Pemberton and Raudkivi (2012) <sup>167</sup>     | CR | 1 | RVOTO caused by a myxoma of the RV                                                                      | IM   |
| Rao et al. (2012) <sup>168</sup>                 | CR | 1 | RVOTO caused by an accessory tissue of the mitral valve in a patient with double outlet right ventricle | IMC  |
| Sogawa et al. (2012) <sup>169</sup>              | CR | 1 | RVOTO caused by a cardiac hemangioma                                                                    | IM   |
| Tamenishi et al. (2012) <sup>170</sup>           | CR | 1 | RVOTO caused by a fibrous histiocytoma originating from the RVOT                                        | IM   |
| Tsubota and Nakamura (2012) <sup>171</sup>       | CR | 1 | RVOTO caused by a non-correction of a tetralogy of Fallot at the adult age                              | IMC  |
| Yagoub et al. (2012) <sup>172</sup>              | CR | 1 | RVOTO caused by a sinus of Valsalva aneurysm                                                            | EM   |
| Altunbas et al. (2013) <sup>173</sup>            | CR | 1 | RVOTO caused by a giant aneurysm of a membranous VSD                                                    | IM   |
| Antonetti et al. (2013) <sup>174</sup>           | CR | 1 | RVOTO in a patient with unrepaired tetralogy of Fallot                                                  | IMC  |
| Bhat et al. (2013) <sup>175</sup>                | CR | 1 | RVOTO caused by an endocarditis of a prosthetic pulmonary valve                                         | EMIa |
| Brown et al. (2013) <sup>176</sup>               | CR | 1 | RVOTO caused by a cardiac angioma                                                                       | IM   |
| Dryzek et al. (2013) <sup>177</sup>              | CR | 1 | RVOTO caused by a giant pseudoaneurysm of the RVOT                                                      | IM   |
| Fontana et al. (2013) <sup>178</sup>             | CR | 1 | RVOTO caused by metastasis of malignant melanoma causing partial obstruction                            | EM   |
| Gavali et al. (2013) <sup>179</sup>              | CR | 1 | RVOTO caused by a sinus of Valsalva aneurysm                                                            | EM   |
| Minagawa et al. (2013) <sup>180</sup>            | CR | 1 | RVOTO caused by unruptured sinus of Valsalva aneurysm                                                   | EM   |
| Mohsen et al. (2013) <sup>181</sup>              | CR | 1 | RVOTO caused by a double-chambered RV                                                                   | IMC  |
| Obrenovic-Kircanski et al. (2013) <sup>182</sup> | CR | 1 | RVOTO caused by a myxoma of the RV                                                                      | IM   |

|                                           |    |   |                                                                                                                                                                    |      |
|-------------------------------------------|----|---|--------------------------------------------------------------------------------------------------------------------------------------------------------------------|------|
| Sah et al. (2013) <sup>183</sup>          | CR | 1 | RVOTO caused by a pseudoaneurysm of a surgically reconstructed RVOT                                                                                                | IMIa |
| Yousif et al. (2013) <sup>184</sup>       | CR | 1 | RVOTO caused by a congenital subpulmonic fibrous ring                                                                                                              | EMC  |
| Zanotti et al. (2013) <sup>185</sup>      | CR | 1 | RVOTO caused by left and main pulmonary artery aneurysm in the setting of lung transplantation and pulmonary stenosis surgery                                      | EM   |
| Bang et al. (2014) <sup>186</sup>         | CR | 1 | RVOTO caused by a cardiac trichinellosis                                                                                                                           | EM   |
| Bruckner et al. (2014) <sup>187</sup>     | CR | 1 | RVOTO caused by a metastatic cardiac sarcoma from the thigh                                                                                                        | EM   |
| Chen et al. (2014) <sup>188</sup>         | CR | 1 | RVOTO caused by a myxoma of the RVOT                                                                                                                               | IM   |
| Cheng et al. (2014) <sup>189</sup>        | CR | 1 | RVOTO due to a ventricular septal defect missed during surgery                                                                                                     | IMIa |
| Kokotsakis et al. (2014) <sup>190</sup>   | CR | 1 | RVOTO caused by a double-chambered RV                                                                                                                              | IMC  |
| Le et al. (2014) <sup>191</sup>           | CR | 1 | RVOTO caused by giant sinus of Valsalva aneurysm                                                                                                                   | EM   |
| Madeo et al. (2014) <sup>192</sup>        | CR | 1 | RVOTO caused by sinus of Valsalva aneurysm                                                                                                                         | EM   |
| Malik et al (2014) <sup>193</sup>         | CR | 1 | RVOTO caused by hypertrophic cardiomyopathy                                                                                                                        | IMC  |
| Patel et al. (2014) <sup>194</sup>        | CS | 1 | RVOTO caused by a sinus of Valsalva aneurysm<br><br>Note that there are 2 cases of sinus of Valsalva aneurysm in this case series, but only 1 of them causes RVOTO | EM   |
| Ramakrishnan et al. (2014) <sup>195</sup> | CR | 1 | RVOTO following elective pulmonary valve balloon dilation                                                                                                          | IMIa |
| Song et al. (2014) <sup>196</sup>         | CR | 1 | RVOTO caused by a leiomyoma of the RV                                                                                                                              | IM   |

|                                                |    |   |                                                                                                                                                                                   |      |
|------------------------------------------------|----|---|-----------------------------------------------------------------------------------------------------------------------------------------------------------------------------------|------|
| Urban et al. (2014) <sup>197</sup>             | CR | 1 | RVOTO caused by an ectopic thyroid tissue in the RVOT                                                                                                                             | EM   |
| Yam and Au (2014) <sup>198</sup>               | CR | 1 | RVOTO caused by a cardiac hemangioma                                                                                                                                              | IM   |
| Buys et al. (2015) <sup>199</sup>              | CS | 1 | RVOTO post correction of a double outlet RV<br><br>Represents a case series of 3 cases of RVOTO post double outlet right ventricle, however only one case was in an adult patient | IMC  |
| Chaudhry-Waterman et al. (2015) <sup>200</sup> | CS | 2 | 2 cases of RVOTO caused by an endocarditis of implanted pulmonary valves                                                                                                          | EMiA |
| Das et al. (2015) <sup>201</sup>               | CR | 1 | RVOTO caused by a sinus of Valsalva aneurysm                                                                                                                                      | EM   |
| Mahesh et al. (2015) <sup>202</sup>            | CR | 1 | RVOTO caused by a membranous septal aneurysm                                                                                                                                      | IM   |
| Mohan and Mohan (2015) <sup>203</sup>          | CR | 1 | RVOTO caused by double chambered right ventricle                                                                                                                                  | IMC  |
| Mori et al. (2015) <sup>204</sup>              | CR | 1 | RVOTO caused by a failure of RV-PA conduit                                                                                                                                        | IMiA |
| Moustafa et al. (2015) <sup>205</sup>          | CS | 2 | RVOTO caused by double chambered right ventricle muscle bundles during systole                                                                                                    | IDC  |
| Omar et al. (2015) <sup>206</sup>              | CR | 1 | RVOTO caused by a metastatic carcinoid tumor to the heart                                                                                                                         | EM   |
| Osada et al. (2015) <sup>207</sup>             | CR | 1 | RVOTO caused by a sinus of Valsalva aneurysm                                                                                                                                      | EM   |
| Rier et al. (2015) <sup>208</sup>              | CR | 1 | RVOTO due to external compression by an aortocoronary saphenous vein graft aneurysm                                                                                               | EMiA |
| Singhal et al. (2015) <sup>10</sup>            | CR | 1 | RVOTO caused by severe valvular and subvalvular stenosis followed by cardiac catheterization resulting in dynamic RVOT obstruction                                                | EDiA |



|                                         |    |   |                                                                                                   |       |
|-----------------------------------------|----|---|---------------------------------------------------------------------------------------------------|-------|
| Sridhar et al. (2015) <sup>209</sup>    | CR | 1 | RVOTO caused by a sinus of Valsalva aneurysm                                                      | EM    |
| Torres et al. (2015) <sup>210</sup>     | CS | 2 | 2 cases of RVOTO caused by an aorto-pulmonary communication after the placement of a RVOT conduit | EM Ia |
| Wang et al. (2015) <sup>211</sup>       | CR | 1 | RVOTO caused by a primary RV intramyocardial lipoma                                               | IM    |
| Abu Saleh et al. (2016) <sup>212</sup>  | CR | 1 | RVOTO caused by a sinus of Valsalva aneurysm                                                      | EM    |
| Caldeira et al. (2016) <sup>213</sup>   | CR | 1 | RVOTO caused by a metastatic myocardial neuroendocrine tumor of gastrointestinal origin           | EM    |
| Demirel et al. (2016) <sup>214</sup>    | CR | 1 | RVOTO caused by double chambered right ventricle                                                  | IMC   |
| Higashi et al. (2016) <sup>215</sup>    | CR | 1 | RVOTO caused by pleomorphic sarcoma in the RVOT                                                   | IM    |
| Kim et al. (2016) <sup>216</sup>        | CR | 1 | RVOTO most likely due to metastatic renal cell carcinoma                                          | EM    |
| Musuku et al. (2016) <sup>217</sup>     | CR | 1 | RVOTO in a double outlet RV                                                                       | IMC   |
| Naqvi et al. (2016) <sup>218</sup>      | CR | 1 | RVOTO caused by a neuroendocrine tumor of the RV                                                  | IM    |
| Rao et al. (2016) <sup>219</sup>        | CR | 1 | RVOTO caused by myxoma protruding through pulmonic valve during systole                           | ID    |
| Schneider et al. (2016) <sup>220</sup>  | CS | 2 | 2 cases of RVOTO caused by non-infective thrombosis of implanted pulmonary valve                  | EM Ia |
| Singh et al. (2016) <sup>221</sup>      | CR | 1 | RVOTO caused by a hydatid cyst in the RVOT                                                        | EM    |
| Zhang et al. (2016) <sup>222</sup>      | CR | 1 | RVOTO caused by a lipoma                                                                          | IM    |
| Antoniucci et al. (2017) <sup>223</sup> | CR | 1 | RVOTO during anesthesia induction for a surgical coronary revascularisation                       | ID Ia |
| Joseph et al (2017) <sup>224</sup>      | CR | 1 | RVOTO caused by metastatic sarcomatoid carcinoma                                                  | EM    |
| Manmadhan et al. (2017) <sup>225</sup>  | CR | 1 | RVOTO due to pulmonary artery intimal spindle cell sarcoma                                        | EM    |

|                                             |    |   |                                                                                                                                                                       |       |
|---------------------------------------------|----|---|-----------------------------------------------------------------------------------------------------------------------------------------------------------------------|-------|
| Padilla-Ibarra et al. (2017) <sup>226</sup> | CR | 1 | RVOTO caused by soft tissue sarcoma in the RVOT                                                                                                                       | IM    |
| Privitera et al. (2017) <sup>227</sup>      | CR | 1 | RVOTO caused by malaligned VSD and presence of perimembranous septal mobile aneurysm protruding in RV during systole                                                  | ID    |
| Unosawa et al. (2017) <sup>228</sup>        | CR | 1 | RVOTO caused by a double-chambered RV                                                                                                                                 | IMC   |
| Verhoeven et al. (2017) <sup>229</sup>      | CR | 1 | RVOTO due to thrombosis of an implanted pulmonary valve                                                                                                               | EM Ia |
| Young et al. (2017) <sup>230</sup>          | CR | 1 | RVOTO caused by a hemangioma of the interventricular septum                                                                                                           | IM    |
| Gangahanumaiah et al. (2018) <sup>231</sup> | CR | 1 | RVOTO following VSD closure and bilateral lung transplantation due to right ventricular hypertrophy                                                                   | EM Ia |
| Gendera et al. (2018) <sup>232</sup>        | CR | 1 | RVOTO caused by a prosthetic pulmonary valve stuck in the pulmonary artery during its delivery                                                                        | EM Ia |
| Isom et al. (2018) <sup>233</sup>           | CR | 1 | RVOTO caused by a cardiac metastasis of a yolk sac tumor                                                                                                              | EM    |
| Karabag et al. (2018) <sup>234</sup>        | CR | 1 | RVOTO caused by a metastatic adenocarcinoma                                                                                                                           | EM    |
| Kellermair et al. (2018) <sup>235</sup>     | CR | 1 | RVOTO caused by thrombosis of implanted pulmonary valve                                                                                                               | EM Ia |
| Kocabas et al. (2018) <sup>236</sup>        | CR | 1 | RVOTO due to a sinus of Valsalva aneurysm                                                                                                                             | EM    |
| Tomar and Bhan (2018) <sup>237</sup>        | CS | 1 | RVOTO caused by pseudoaneurysm as a complication of RVOT reconstruction<br><br>The case series features 2 cases, however one case was rejected since it was pediatric | IM Ia |
| Zheng et al. (2018) <sup>238</sup>          | CR | 1 | RVOTO caused by a myxoma                                                                                                                                              | IM    |

|                                              |    |   |                                                                                          |      |
|----------------------------------------------|----|---|------------------------------------------------------------------------------------------|------|
| Akikwala et al. (2019) <sup>239</sup>        | CR | 1 | RVOTO caused by a hemangioma of the pulmonary artery                                     | EM   |
| Briosa E. G. A. et al. (2019) <sup>240</sup> | CR | 1 | RVOTO caused by renal cell carcinoma metastasis                                          | EM   |
| Mohan et al. (2019) <sup>241</sup>           | CR | 1 | RVOTO caused by hypertrophic cardiomyopathy                                              | IMC  |
| Munirathinam et al. (2019) <sup>242</sup>    | CR | 1 | RVOTO following aortic valve replacement and pulmonary valvotomy                         | ID1a |
| Ramnath et al. (2019) <sup>243</sup>         | CR | 1 | RVOTO due to narrowing of the pulmonary valve by a suture of the mechanical aortic valve | EM1a |
| Serban et al. (2019) <sup>244</sup>          | CR | 1 | RVOTO caused by a sinus of Valsalva aneurysm                                             | EM   |
| Zhu et al. (2019) <sup>245</sup>             | CR | 1 | RVOTO caused by double chambered right ventricle in a patient with VSD                   | IMC  |
| Zivkonic et al. (2019) <sup>246</sup>        | CR | 1 | RVOTO caused by a calcified amorphous tumor in the RV                                    | IM   |

C, congenital; CR, case report; CS, case series; D, dynamic; E, extrinsic; HCM, hypertrophic cardiomyopathy; I, intrinsic; Ia, iatrogenic; M, mechanical; n, number; NA, not applicable; p, prospective group; PA, pulmonary artery; PS, prospective study; r, retrospective group; RS, retrospective study; RV, right ventricle; RVOT, right ventricular outflow tract; RVOTO, right ventricular outflow tract obstruction; VSD, ventricular septal defect; \*Rastelli procedure: relieves pulmonary obstruction in double outlet right ventricle with pulmonary stenosis by using a pulmonary or aortic homograft conduit; \*Nuss procedure: minimally invasive correction of pectus excavatum.

**Supplemental Table S2. Prevalence of RVOTO by detailed etiology (n=291)**

|                                                    |    |
|----------------------------------------------------|----|
| Extrinsic Mechanical Non-Iatrogenic Non-Congenital | 94 |
| Intrinsic Mechanical Non-Iatrogenic Non-Congenital | 76 |
| Intrinsic Mechanical Congenital                    | 58 |
| Extrinsic Mechanical Iatrogenic                    | 24 |
| Intrinsic Dynamic Iatrogenic                       | 21 |
| Intrinsic Mechanical Iatrogenic                    | 9  |
| Extrinsic Dynamic Iatrogenic                       | 2  |
| Intrinsic Dynamic Non-Iatrogenic Non-Congenital    | 3  |
| Intrinsic Dynamic Congenital                       | 2  |
| Extrinsic Mechanical Congenital                    | 1  |
| Extrinsic Dynamic Non-Iatrogenic Non-Congenital    | 1  |
| Extrinsic Dynamic Congenital                       | 0  |

**Supplemental Table S3. Underlying pathology in non-congenital and non-iatrogenic reported cases of RVOTO (n=174)**

| Primary cardiac tumors (n=71)                                                                           |                          | Extra-cardiac tumors (n=40)                      |                          | Other causes (n=63)                                                                                                                                                               | Number of reported cases |
|---------------------------------------------------------------------------------------------------------|--------------------------|--------------------------------------------------|--------------------------|-----------------------------------------------------------------------------------------------------------------------------------------------------------------------------------|--------------------------|
| Pathology                                                                                               | Number of reporter cases | Metastasis origin                                | Number of reporter cases |                                                                                                                                                                                   |                          |
| Myxoma<br>15, 20, 24, 31, 64, 71, 85, 93, 101, 112, 116, 131,<br>149, 159, 162, 167, 182, 188, 219, 238 | 20                       | Renal cell carcinoma<br>23,62, 118,216,240       | 5                        | Sinus of Valsalva aneurysm<br>21, 35, 39, 41, 46, 56, 60(2),76, 81, 100, 103, 110, 125,<br>127, 136,139,144, 148, 153,172,179,180, 191, 192, 194, 201, 207, 209,<br>212, 236, 244 | 32                       |
| Pulmonary artery/trunk neoplasm<br>26(11),104(2),111,130, 137, 161,225                                  | 18                       | Compression by lymphoma <sup>54(2),80, 147</sup> | 4                        | Septal aneurysm<br>30,63, 106, 107, 141, 157,202,227                                                                                                                              | 8                        |
| Leiomyosarcoma<br>47,77,87, 94, 109, 115, 145                                                           | 7                        | Carcinoma of the colon <sup>29,37, 59</sup>      | 3                        | Ectopic thyroid tissue in RV<br>36, 43, 50,84,197                                                                                                                                 | 5                        |
| Hemangioma<br>58, 86, 113, 169, 198,230                                                                 | 6                        | Sarcoma <sup>40, 187, 224</sup>                  | 3                        | Hydatid cyst <sup>38,44, 140,221</sup>                                                                                                                                            | 4                        |
| Sarcoma<br>72,215,226                                                                                   | 3                        | Hepatocellular tumor <sup>32, 89</sup>           | 2                        | Pulmonary artery aneurysm <sup>95,123,185</sup>                                                                                                                                   | 3                        |
| Fibrosarcoma <sup>16, 83</sup>                                                                          | 2                        | Histiocytoma <sup>57,79</sup>                    | 2                        | Other<br>18, 34, 42, 53, 74, 105, 117, 135, 173, 177, 186                                                                                                                         | 11                       |
| Lipoma <sup>211,222</sup>                                                                               | 2                        | Lung cancer <sup>90, 234</sup>                   | 2                        |                                                                                                                                                                                   |                          |
| Other<br>28, 33, 68, 73, 121, 126, 132, 170, 176,<br>196, 218, 239, 246                                 | 13                       | Melanoma <sup>49,178</sup>                       | 2                        |                                                                                                                                                                                   |                          |

|  |  |                                                                    |    |  |  |
|--|--|--------------------------------------------------------------------|----|--|--|
|  |  | Metastatic thyroid tumor <sup>45,69</sup>                          | 2  |  |  |
|  |  | Yolk sac tumor <sup>124, 233</sup>                                 | 2  |  |  |
|  |  | Other<br>19, 27, 52, 54, 59(2), 97, 98, 129, 156,<br>160, 206, 213 | 13 |  |  |

RVOTO, right ventricular outflow tract obstruction; GI, gastrointestinal; n, number; RV, right ventricle.

**Supplemental Table S4. Congenital reported cases of RVOTO (n=61)**

| Etiology                                                                                 | Cases |
|------------------------------------------------------------------------------------------|-------|
| Hypertrophic cardiomyopathy<br>51(4),91, 92, 96, 102(9),128, 133,152, 164(9),193, 241    | 30    |
| Double-chambered right ventricle<br>88(3), 158(2),164(2),181,190,203, 205(2),214,228,245 | 15    |
| Double outlet right ventricle <sup>17(2),168, 199,217</sup>                              | 5     |
| Infundibular pulmonary stenosis <sup>22, 146, 154, 171</sup>                             | 4     |
| Uncorrected tetralogy of Fallot <sup>163(2),174</sup>                                    | 3     |
| Other <sup>25, 150, 151, 184</sup>                                                       | 4     |

n, number; RVOTO, right ventricular outflow tract obstruction.

**Supplemental Table S5. Iatrogenic reported cases of RVOTO (n=56)**

| Etiology                                                                                                        | Incidence |
|-----------------------------------------------------------------------------------------------------------------|-----------|
| Dynamic systolic obliteration associated with vasoactive/ionotropic agent use during surgery <sup>122(11)</sup> | 11        |
| Post-lung transplantation obstruction <sup>55,61,65,67(2),70, 108, 142,231</sup>                                | 9         |
| Endocarditis <sup>119,175,200(2)</sup>                                                                          | 4         |
| Thrombosis of implanted pulmonary valve <sup>220(2),229,235</sup>                                               | 4         |
| Aorto-pulmonary communication <sup>210(2)</sup>                                                                 | 2         |
| Pseudoaneurysm following RVOT reconstruction <sup>183,237</sup>                                                 | 2         |
| RV thickening following radiotherapy <sup>48,114</sup>                                                          | 2         |
| Stenosis of grafted pulmonary artery conduit <sup>120(2)</sup>                                                  | 2         |
| Anesthesia induction for CABG <sup>223</sup>                                                                    | 1         |
| Compression by the aorta post-pneumonectomy <sup>78</sup>                                                       | 1         |
| Compression by post-operative mediastinal hematoma <sup>66</sup>                                                | 1         |
| Compression by pseudoaneurysm of aortic graft <sup>82</sup>                                                     | 1         |
| Compression by pseudoaneurysm of grafted coronary artery <sup>75</sup>                                          | 1         |
| Compression by saphenous vein graft aneurysm <sup>208</sup>                                                     | 1         |
| Fibrous band compression of right heart following Nuss procedure <sup>166</sup>                                 | 1         |
| Implanted pulmonary valve stenosis and/or insufficiency <sup>134</sup>                                          | 1         |
| Infected thrombus compression of RVOT during pregnancy following Rastelli procedure* <sup>143</sup>             | 1         |



|                                                                                  |   |
|----------------------------------------------------------------------------------|---|
| Konno procedure* failure <sup>138</sup>                                          | 1 |
| Narrowing of pulmonary valve by suture <sup>243</sup>                            | 1 |
| Obstruction by a displaced medical patch <sup>165</sup>                          | 1 |
| Obstruction due to cardiac catheterization <sup>10</sup>                         | 1 |
| Obstruction following pulmonary valve balloon dilation <sup>195</sup>            | 1 |
| Obstruction post-aortic valve replacement and pulmonary valvotomy <sup>242</sup> | 1 |
| Post-surgical thoracic tamponade <sup>99</sup>                                   | 1 |
| Pulmonary valve graft stuck during its implantation <sup>232</sup>               | 1 |
| RV-PA conduit obstruction <sup>204</sup>                                         | 1 |
| RVOT homograft failure <sup>155</sup>                                            | 1 |
| VSD missed during surgery <sup>189</sup>                                         | 1 |

CABG, coronary artery bypass graft; n, number; PA, pulmonary artery; RV, right ventricle; RVOT, right ventricular outflow tract; VSD, ventricular septal defect; \*Rastelli procedure, relieves pulmonary obstruction in double outlet right ventricle with pulmonary stenosis by using a pulmonary or aortic homograft conduit; \*Konno procedure, aortic valve autograft and RVOT dilatation; \*Nuss procedure, minimally invasive surgical correction of pectus excavatum.

**Supplemental Table S6. Reported prevalence of RVOTO**

| Population studied/etiology                                                                                                                                                     | n     | Prevalence     |
|---------------------------------------------------------------------------------------------------------------------------------------------------------------------------------|-------|----------------|
| Studies with high risk patients                                                                                                                                                 |       |                |
| Patients with a diagnosed sinus of Valsalva aneurysm <sup>76</sup>                                                                                                              | 9     | 1/9 (11.1%)    |
| Patients with hypertrophic cardiomyopathy <sup>102</sup>                                                                                                                        | 91    | 9/91 (9.9%)    |
| Patients with double-chambered right ventricle or abnormal hypertrophic right ventricle muscle bundle before undergoing correction of sinus of Valsalva aneurysm <sup>164</sup> | 222   | 11/222 (5.0%)  |
| Studies with unselected cardiac surgery patients                                                                                                                                |       |                |
| Patients undergoing TEE <sup>122</sup>                                                                                                                                          | 670*  | 6/670 (0.90%)* |
|                                                                                                                                                                                 | 130** | 5/130 (3.8%)** |

n: number; TEE: transesophageal echocardiography.

\*retrospective group; \*\*prospective group.

**Supplemental Figure S1. Flow diagram result of the search strategy**

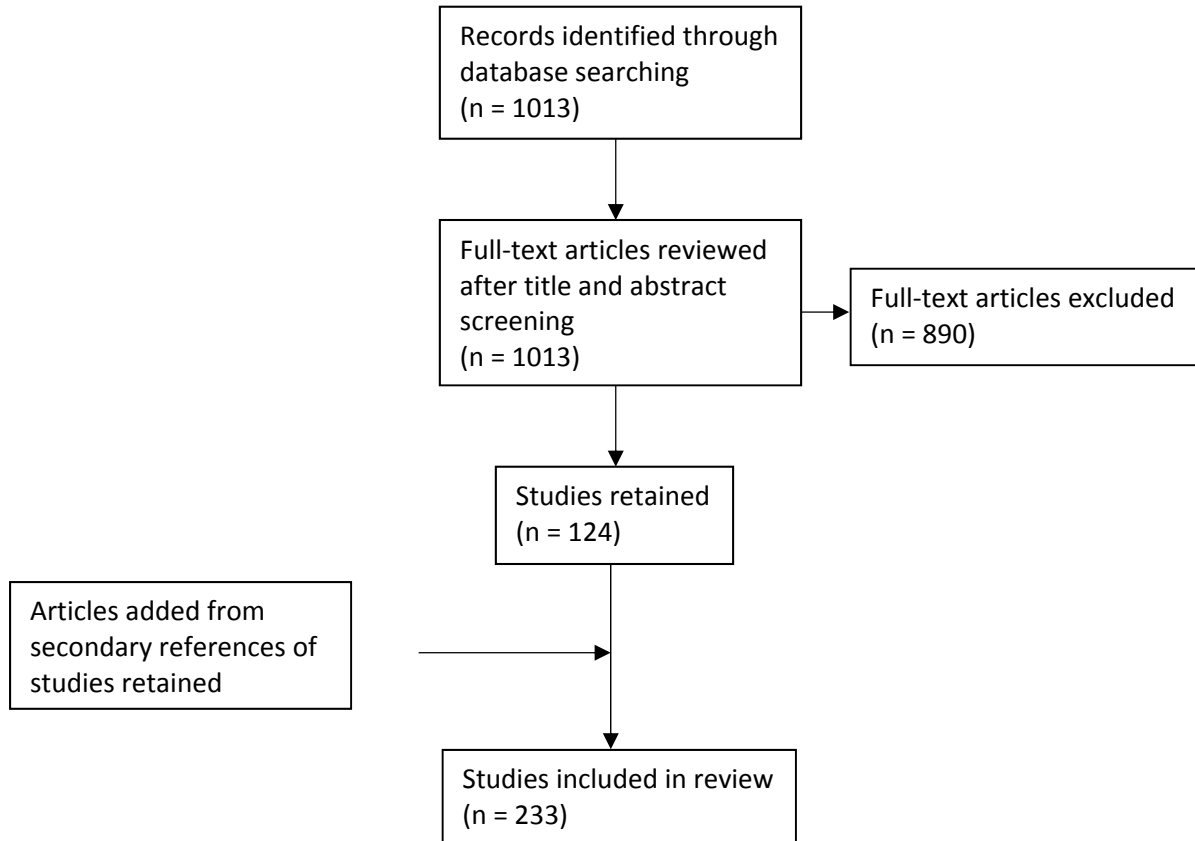

**Supplemental Appendix S2. Quality Assessment Tool for Observational Cohorts and Cross-Sectional Studies**

**Yilmaz AT, Demirkilic U, Ozal E, Tatar H, Ozturk OY. Aneurysms of the sinus of Valsalva. *J Cardiovasc Surg (Torino)*. 1997;38:119-124.**

| Criteria                                                                                                                                                                                                                                   | Yes | No | Other<br>(CD, NR,<br>NA)* |
|--------------------------------------------------------------------------------------------------------------------------------------------------------------------------------------------------------------------------------------------|-----|----|---------------------------|
| 1. Was the research question or objective in this paper clearly stated?                                                                                                                                                                    | X   |    |                           |
| 2. Was the study population clearly specified and defined?                                                                                                                                                                                 | X   |    |                           |
| 3. Was the participation rate of eligible persons at least 50%?                                                                                                                                                                            |     |    | NA                        |
| 4. Were all the subjects selected or recruited from the same or similar populations (including the same time period)? Were inclusion and exclusion criteria for being in the study prespecified and applied uniformly to all participants? | X   |    |                           |

| Criteria                                                                                                                                                                                                         | Yes | No | Other<br>(CD, NR,<br>NA)* |
|------------------------------------------------------------------------------------------------------------------------------------------------------------------------------------------------------------------|-----|----|---------------------------|
| 5. Was a sample size justification, power description, or variance and effect estimates provided?                                                                                                                |     | X  |                           |
| 6. For the analyses in this paper, were the exposure(s) of interest measured prior to the outcome(s) being measured?                                                                                             |     |    | NA                        |
| 7. Was the timeframe sufficient so that one could reasonably expect to see an association between exposure and outcome if it existed?                                                                            |     |    | NA                        |
| 8. For exposures that can vary in amount or level, did the study examine different levels of the exposure as related to the outcome (e.g., categories of exposure, or exposure measured as continuous variable)? |     |    | NA                        |
| 9. Were the exposure measures (independent variables) clearly defined, valid, reliable, and implemented consistently across all study participants?                                                              |     |    | NA                        |

| Criteria                                                                                                                                                  | Yes | No | Other<br>(CD, NR,<br>NA)* |
|-----------------------------------------------------------------------------------------------------------------------------------------------------------|-----|----|---------------------------|
| 10. Was the exposure(s) assessed more than once over time?                                                                                                |     |    | NA                        |
| 11. Were the outcome measures (dependent variables) clearly defined, valid, reliable, and implemented consistently across all study participants?         | X   |    |                           |
| 12. Were the outcome assessors blinded to the exposure status of participants?                                                                            |     |    | NA                        |
| 13. Was loss to follow-up after baseline 20% or less?                                                                                                     | X   |    |                           |
| 14. Were key potential confounding variables measured and adjusted statistically for their impact on the relationship between exposure(s) and outcome(s)? |     |    | NA                        |

**Quality Rating (Good, Fair, or Poor)**

Rater #1 (AC): Good

Rater #2 (AD): Good

Additional Comments (If POOR, please state why):

**Shimizu M, Kawai H, Yokota Y, Yokoyama M. Echocardiographic assessment of right ventricular obstruction in hypertrophic cardiomyopathy. *Circ J.* 2003;67:855-860.**

| Criteria                                                                                                                                                                                                                                   | Yes                                                 | No | Other<br>(CD, NR, NA)*       |
|--------------------------------------------------------------------------------------------------------------------------------------------------------------------------------------------------------------------------------------------|-----------------------------------------------------|----|------------------------------|
| 1. Was the research question or objective in this paper clearly stated?                                                                                                                                                                    | X                                                   |    |                              |
| 2. Was the study population clearly specified and defined?                                                                                                                                                                                 |                                                     | X  |                              |
| 3. Was the participation rate of eligible persons at least 50%?                                                                                                                                                                            |                                                     |    | NA                           |
| 4. Were all the subjects selected or recruited from the same or similar populations (including the same time period)? Were inclusion and exclusion criteria for being in the study prespecified and applied uniformly to all participants? | X<br><br>(inclusion and exclusion criteria applied) |    | NR (population not reported) |
| 5. Was a sample size justification, power description, or variance and effect estimates provided?                                                                                                                                          |                                                     | X  |                              |



| Criteria                                                                                                                                                                                                         | Yes | No | Other<br>(CD, NR, NA)* |
|------------------------------------------------------------------------------------------------------------------------------------------------------------------------------------------------------------------|-----|----|------------------------|
| 6. For the analyses in this paper, were the exposure(s) of interest measured prior to the outcome(s) being measured?                                                                                             |     |    | NA                     |
| 7. Was the timeframe sufficient so that one could reasonably expect to see an association between exposure and outcome if it existed?                                                                            |     |    | NA                     |
| 8. For exposures that can vary in amount or level, did the study examine different levels of the exposure as related to the outcome (e.g., categories of exposure, or exposure measured as continuous variable)? |     |    | NA                     |
| 9. Were the exposure measures (independent variables) clearly defined, valid, reliable, and implemented consistently across all study participants?                                                              |     |    | NA                     |
| 10. Was the exposure(s) assessed more than once over time?                                                                                                                                                       |     |    | NA                     |

| Criteria                                                                                                                                                  | Yes | No | Other<br>(CD, NR, NA)* |
|-----------------------------------------------------------------------------------------------------------------------------------------------------------|-----|----|------------------------|
| 11. Were the outcome measures (dependent variables) clearly defined, valid, reliable, and implemented consistently across all study participants?         | X   |    |                        |
| 12. Were the outcome assessors blinded to the exposure status of participants?                                                                            |     |    | NA                     |
| 13. Was loss to follow-up after baseline 20% or less?                                                                                                     |     |    | NA                     |
| 14. Were key potential confounding variables measured and adjusted statistically for their impact on the relationship between exposure(s) and outcome(s)? |     |    | NA                     |

**Quality Rating (Good, Fair, or Poor)**

Rater #1 (AC): Poor

Rater #2 (AD): Poor

Additional Comments (If POOR, please state why):

Study population from which sample was taken is poorly defined (no time period, no region or location). No estimates of power provided. Most criteria not met.

\*CD, cannot determine; NA, not applicable; NR, not reported.

**Guo HW, Xiong H, Xu JP, Wang XQ, Hu SS. Surgical correction for sinus of valsalva aneurysm with right ventricular outflow tract stenosis. *J Card Surg.* 2012;27:99-102.**

| Criteria                                                                                                                                                                                                                                   | Yes | No | Other<br>(CD, NR,<br>NA)* |
|--------------------------------------------------------------------------------------------------------------------------------------------------------------------------------------------------------------------------------------------|-----|----|---------------------------|
| 1. Was the research question or objective in this paper clearly stated?                                                                                                                                                                    | X   |    |                           |
| 2. Was the study population clearly specified and defined?                                                                                                                                                                                 | X   |    |                           |
| 3. Was the participation rate of eligible persons at least 50%?                                                                                                                                                                            |     |    | NA                        |
| 4. Were all the subjects selected or recruited from the same or similar populations (including the same time period)? Were inclusion and exclusion criteria for being in the study prespecified and applied uniformly to all participants? | X   |    |                           |
| 5. Was a sample size justification, power description, or variance and effect estimates provided?                                                                                                                                          |     | X  |                           |

| Criteria                                                                                                                                                                                                         | Yes | No | Other<br>(CD, NR,<br>NA)* |
|------------------------------------------------------------------------------------------------------------------------------------------------------------------------------------------------------------------|-----|----|---------------------------|
| 6. For the analyses in this paper, were the exposure(s) of interest measured prior to the outcome(s) being measured?                                                                                             |     |    | NA                        |
| 7. Was the timeframe sufficient so that one could reasonably expect to see an association between exposure and outcome if it existed?                                                                            |     |    | NA                        |
| 8. For exposures that can vary in amount or level, did the study examine different levels of the exposure as related to the outcome (e.g., categories of exposure, or exposure measured as continuous variable)? |     |    | NA                        |
| 9. Were the exposure measures (independent variables) clearly defined, valid, reliable, and implemented consistently across all study participants?                                                              |     |    | NA                        |
| 10. Was the exposure(s) assessed more than once over time?                                                                                                                                                       |     |    | NA                        |

| Criteria                                                                                                                                                  | Yes | No | Other<br>(CD, NR,<br>NA)* |
|-----------------------------------------------------------------------------------------------------------------------------------------------------------|-----|----|---------------------------|
| 11. Were the outcome measures (dependent variables) clearly defined, valid, reliable, and implemented consistently across all study participants?         | X   |    |                           |
| 12. Were the outcome assessors blinded to the exposure status of participants?                                                                            |     |    | NA                        |
| 13. Was loss to follow-up after baseline 20% or less?                                                                                                     | X   |    |                           |
| 14. Were key potential confounding variables measured and adjusted statistically for their impact on the relationship between exposure(s) and outcome(s)? |     |    | NA                        |

**Quality Rating (Good, Fair, or Poor)**

Rater #1 (AC): Good

Rater #2 (AD): Good

Additional Comments (If POOR, please state why):

\*CD, cannot determine; NA, not applicable; NR, not reported.

**Denault AY, Chaput M, Couture P, Hebert Y, Haddad F, Tardif JC. Dynamic right ventricular outflow tract obstruction in cardiac surgery. *J Thorac Cardiovasc Surg.* 2006;132:43-49.**

| Criteria                                                                                                                                                                                                                                   | Yes | No | Other<br>(CD, NR,<br>NA)* |
|--------------------------------------------------------------------------------------------------------------------------------------------------------------------------------------------------------------------------------------------|-----|----|---------------------------|
| 1. Was the research question or objective in this paper clearly stated?                                                                                                                                                                    | X   |    |                           |
| 2. Was the study population clearly specified and defined?                                                                                                                                                                                 | X   |    |                           |
| 3. Was the participation rate of eligible persons at least 50%?                                                                                                                                                                            |     |    | NR                        |
| 4. Were all the subjects selected or recruited from the same or similar populations (including the same time period)? Were inclusion and exclusion criteria for being in the study prespecified and applied uniformly to all participants? | X   |    |                           |
| 5. Was a sample size justification, power description, or variance and effect estimates provided?                                                                                                                                          |     | X  |                           |



| Criteria                                                                                                                                                                                                         | Yes | No | Other<br>(CD, NR,<br>NA)* |
|------------------------------------------------------------------------------------------------------------------------------------------------------------------------------------------------------------------|-----|----|---------------------------|
| 6. For the analyses in this paper, were the exposure(s) of interest measured prior to the outcome(s) being measured?                                                                                             |     |    | NA                        |
| 7. Was the timeframe sufficient so that one could reasonably expect to see an association between exposure and outcome if it existed?                                                                            |     |    | NA                        |
| 8. For exposures that can vary in amount or level, did the study examine different levels of the exposure as related to the outcome (e.g., categories of exposure, or exposure measured as continuous variable)? |     |    | NA                        |
| 9. Were the exposure measures (independent variables) clearly defined, valid, reliable, and implemented consistently across all study participants?                                                              |     |    | NA                        |
| 10. Was the exposure(s) assessed more than once over time?                                                                                                                                                       |     |    | NA                        |

| Criteria                                                                                                                                                  | Yes | No | Other<br>(CD, NR,<br>NA)* |
|-----------------------------------------------------------------------------------------------------------------------------------------------------------|-----|----|---------------------------|
| 11. Were the outcome measures (dependent variables) clearly defined, valid, reliable, and implemented consistently across all study participants?         | X   |    |                           |
| 12. Were the outcome assessors blinded to the exposure status of participants?                                                                            |     |    | NA                        |
| 13. Was loss to follow-up after baseline 20% or less?                                                                                                     | X   |    |                           |
| 14. Were key potential confounding variables measured and adjusted statistically for their impact on the relationship between exposure(s) and outcome(s)? |     |    | NA                        |

**Quality Rating (Good, Fair, or Poor)**

Rater #1 (AC): Good

Rater #2 (AD): Good

Additional Comments (If POOR, please state why):

\*CD, cannot determine; NA, not applicable; NR, not reported.

## MOOSE (Meta-analyses Of Observational Studies in Epidemiology) Checklist

A reporting checklist for Authors, Editors, and Reviewers of Meta-analyses of Observational Studies. You must report the page number in your manuscript where you consider each of the items listed in this checklist. If you have not included this information, either revise your manuscript accordingly before submitting or note N/A.

| <b>Reporting Criteria</b>                                                               | <b>Reported (Yes/No)</b> | <b>Reported on Page No.</b> |
|-----------------------------------------------------------------------------------------|--------------------------|-----------------------------|
| <b>Reporting of Background</b>                                                          |                          |                             |
| Problem definition                                                                      | Yes                      | 4                           |
| Hypothesis statement                                                                    | No                       |                             |
| Description of Study Outcome(s)                                                         | Yes                      | 4                           |
| Type of exposure or intervention used                                                   | Yes                      | 4                           |
| Type of study design used                                                               | Yes                      | 4                           |
| Study population                                                                        | Yes                      | 4                           |
| <b>Reporting of Search Strategy</b>                                                     |                          |                             |
| Qualifications of searchers (eg, librarians and investigators)                          | Yes                      | 4-4                         |
| Search strategy, including time period included in the synthesis and keywords           | Yes                      | 5, Suppl. Mat.              |
| Effort to include all available studies, including contact with authors                 | Yes                      | 5                           |
| Databases and registries searched                                                       | Yes                      | 5, Suppl. Mat.              |
| Search software used, name and version, including special features used (eg, explosion) | Yes                      | 6                           |
| Use of hand searching (eg, reference lists of obtained articles)                        | Yes                      | 5                           |
| List of citations located and those excluded, including justification                   | Yes                      | 5                           |

|                                                                                                                                            |                          |                             |
|--------------------------------------------------------------------------------------------------------------------------------------------|--------------------------|-----------------------------|
| Method for addressing articles published in languages other than English                                                                   | Yes                      | 4                           |
| Method of handling abstracts and unpublished studies                                                                                       | Yes                      | 4                           |
| Description of any contact with authors                                                                                                    | No                       |                             |
| <b>Reporting of Methods</b>                                                                                                                |                          |                             |
| Description of relevance or appropriateness of studies assembled for assessing the hypothesis to be tested                                 | Yes                      | 4                           |
| Rationale for the selection and coding of data (eg, sound clinical principles or convenience)                                              | No                       |                             |
| Documentation of how data were classified and coded (eg, multiple raters, blinding, and interrater reliability)                            | Yes                      | 5-6                         |
| Assessment of confounding (eg, comparability of cases and controls in studies where appropriate)                                           | No                       |                             |
| <b>Reporting Criteria</b>                                                                                                                  | <b>Reported (Yes/No)</b> | <b>Reported on Page No.</b> |
| Assessment of study quality, including blinding of quality assessors; stratification or regression on possible predictors of study results | Yes                      | 6                           |
| Assessment of heterogeneity                                                                                                                | Yes                      | 6                           |

|                                                                                                                                                                                                                                                                              |     |             |
|------------------------------------------------------------------------------------------------------------------------------------------------------------------------------------------------------------------------------------------------------------------------------|-----|-------------|
| Description of statistical methods (eg, complete description of fixed or random effects models, justification of whether the chosen models account for predictors of study results, dose-response models, or cumulative meta-analysis) in sufficient detail to be replicated | Yes | 6           |
| Provision of appropriate tables and graphics                                                                                                                                                                                                                                 | Yes | 9           |
| <b>Reporting of Results</b>                                                                                                                                                                                                                                                  |     |             |
| Table giving descriptive information for each study included                                                                                                                                                                                                                 | Yes | Suppl. Mat. |
| Results of sensitivity testing (eg, subgroup analysis)                                                                                                                                                                                                                       | Yes | 6           |
| Indication of statistical uncertainty of findings                                                                                                                                                                                                                            | Yes | 6           |
| <b>Reporting of Discussion</b>                                                                                                                                                                                                                                               |     |             |
| Quantitative assessment of bias (eg, publication bias)                                                                                                                                                                                                                       | Yes | 12          |
| Justification for exclusion (eg, exclusion of non-English-language citations)                                                                                                                                                                                                | Yes | 6           |
| Assessment of quality of included studies                                                                                                                                                                                                                                    | Yes | 10          |
| <b>Reporting of Conclusions</b>                                                                                                                                                                                                                                              |     |             |
| Consideration of alternative explanations for observed results                                                                                                                                                                                                               | Yes | 12          |
| Generalization of the conclusions (ie, appropriate for the data presented and within the domain of the literature review)                                                                                                                                                    | Yes | 12-13       |
| Guidelines for future research                                                                                                                                                                                                                                               | Yes | 13          |
| Disclosure of funding source                                                                                                                                                                                                                                                 | No  |             |

## References

1. Davila-Roman VG, Waggoner AD, Hopkins WE, Barzilai B. Right ventricular dysfunction in low output syndrome after cardiac operations: assessment by transesophageal echocardiography. *Ann Thorac Surg* 1995;60:1081-6.
2. Denault AY, Couture P, Beaulieu Y, et al. Right Ventricular Depression After Cardiopulmonary Bypass for Valvular Surgery. *J Cardiothorac Vasc Anesth* 2015;29:836-44.
3. Estrada VH, Franco DL, Moreno AA, Gambasica JA, Nunez CC. Postoperative Right Ventricular Failure in Cardiac Surgery. *Cardiol Res* 2016;7:185-95.
4. Bootsma IT, de Lange F, Koopmans M, et al. Right Ventricular Function After Cardiac Surgery Is a Strong Independent Predictor for Long-Term Mortality. *J Cardiothorac Vasc Anesth* 2017;31:1656-62.
5. Verbrugge FH, Dupont M, Steels P, et al. Abdominal contributions to cardiorenal dysfunction in congestive heart failure. *J Am Coll Cardiol* 2013;62:485-95.
6. Sundaram V, Fang JC. Gastrointestinal and Liver Issues in Heart Failure. *Circulation* 2016;133:1696-703.
7. Therrien J, Dore A, Gersony W, et al. CCS Consensus Conference 2001 update: recommendations for the management of adults with congenital heart disease. Part I. *Can J Cardiol* 2001;17:940-59.
8. Raymond M, Gronlykke L, Couture EJ, et al. Perioperative Right Ventricular Pressure Monitoring in Cardiac Surgery. *J Cardiothorac Vasc Anesth* 2019;33:1090-104.
9. Bashore TM. Adult congenital heart disease: right ventricular outflow tract lesions. *Circulation* 2007;115:1933-47.

10. Singhal A, Kumar S, Kapoor A. Sudden iatrogenic suicidal right ventricle. *Indian Heart J* 2015;67:406-8.
11. Dall'Agata A, Cromme-Dijkhuis AH, Meijboom FJ, et al. Use of three-dimensional echocardiography for analysis of outflow obstruction in congenital heart disease. *Am J Cardiol* 1999;83:921-5.
12. Putterman C, Gilon D, Uretzki G, Bar-Ziv J, Polliack A. Right ventricular outflow tract obstruction due to extrinsic compression by non-Hodgkin's lymphoma: importance of echocardiographic diagnosis and follow up. *Leuk Lymphoma* 1992;7:211-5.
13. Kaushal SK, Radhakrishanan S, Dagar KS, et al. Significant intraoperative right ventricular outflow gradients after repair for tetralogy of Fallot: to revise or not to revise? *Ann Thorac Surg* 1999;68:1705-12; discussion 1712-3.
14. Sackett DL. Rules of evidence and clinical recommendations on the use of antithrombotic agents. *Chest* 1989;95:2S-4S.
15. Doohen DJ, Greer JW, Diorio N, Timmes JJ. Emergency Excision of a Myxoma of the Right Ventricle Which Was Obstructing the Right Ventricular Outflow Tract. *J Thorac Cardiovasc Surg* 1964;47:342-8.
16. Goldstein S, Mahoney EB. Right ventricular fibrosarcoma causing pulmonic stenosis. *Am J Cardiol* 1966;17:570-8.
17. Kiser JC, Ongley PA, Kirklin JW, Clarkson PM, McGoon DC. Surgical treatment of dextrocardia with inversion of ventricles and double-outlet right ventricle. *J Thorac Cardiovasc Surg* 1968;55:6-15.
18. Rawls WJ, Shuford WH, Logan WD, Hurst JW, Schlant RC. Right ventricular outflow tract obstruction produced by a myocardial abscess in a patient with tuberculosis. *Am J Cardiol* 1968;21:738-5.
19. McLoughlin MJ. Obstruction of the right ventricular outflow tract due to metastasis. *Brit J Radiol* 1970;43:573-6.
20. Hubbard TF, Neil RN. Myxoma of the right ventricle. Report of a case with unusual findings. *Am Heart J* 1971;81:548-53.



21. Kerber RE, Ridges JD, Kriss JP, Silverman JF, Anderson ET, Harrison DC. Unruptured aneurysm of the sinus of valsalva producing right ventricular outflow obstruction. *Am J Med* 1972;53:775-83.
22. Merin G, Borman JB, Aviad I, Maddock CR, Stern S. Double aortic arch associated with coarctation, ventricular septal defect and right ventricular outflow tract obstruction. Successful surgical repair. *Am J Cardiol* 1972;29:564-7.
23. Gordon R, Kimbiris D, Segal BL. Obstruction of the right ventricular outflow tract due to metastatic hypernephroma. *Vasc Surg* 1973;7:213-9.
24. Zager J, Smith JO, Goldstein S, Franch RH. Tricuspid and pulmonary valve obstruction relieved by removal of a myxoma of the right ventricle. *Am J Cardiol* 1973;32:101-4.
25. Kleinfeld M, Rozanski JJ, Brumlik JV. Situs inversus, subaortic and subpulmonic stenosis, ventricular septal defect, and single coronary artery. *Chest* 1976;70:391-3.
26. Shmookler BM, Marsh HB, Roberts WC. Primary sarcoma of the pulmonary trunk and/or right or left main pulmonary artery--a rare cause of obstruction to right ventricular outflow. Report on two patients and analysis of 35 previously described patients. *Am J Med* 1977;63:263-72.
27. Griffith DN, Myers A. Obstruction of right ventricular outflow tract by solitary ovarian metastasis. *Br Heart J* 1978;40:700-2.
28. Betancourt B, Defendini EA, Johnson C, et al. Severe right ventricular outflow tract obstruction caused by an intracavitary cardiac neurilemoma: succesful surgical removal and postoperative diagnosis. *Chest* 1979;75:522-4.

29. Birmingham CL, Peretz DI. Metastatic carcinoma presenting as obstruction to the right ventricular outflow tract. Report of a case and review of the literature. *Am Heart J* 1979;97:229-32.
30. Silvestre A, Benchimol A, Desser KB, Sheasby C. Septal aneurysm and right ventricular obstruction: a case report. *Angiology* 1979;30:56-61.
31. Hada Y, Wolfe C, Murray GF, Craige E. Right ventricular myxoma. Case report and review of phonocardiographic and auscultatory manifestations. *Am Heart J* 1980;100:871-7.
32. Steffens TG, Mayer HS, Das SK. Echocardiographic diagnosis of a right ventricular metastatic tumor. *Arch Intern Med* 1980;140:122-3.
33. Ceretto WJ, Miller ML, Shea PM, Gregory CW, Vieweg WV. Malignant mesenchymoma obstructing the right ventricular outflow tract. *Am Heart J* 1981;101:114-5.
34. Upward JW, Daly K, Jackson G. Pericardial abscess causing right ventricular outflow tract obstruction. Successful surgical correction. *Br Heart J* 1983;49:507-9.
35. Ellis JH, Hobbs RE, Moodie DS, Yiannikas J, Gill CC. Recurrent sinus of Valsalva aneurysm with right ventricular outflow tract obstruction. *Cleve Clin Q* 1984;51:77-81.
36. Lo HM, Tseng YZ, Tseng CD, Chu SH, Chuang SM, Wu TL. Intracardiac goiter: a cause of right ventricular outflow obstruction and successful operative therapy. *Am J Cardiol* 1984;53:976-8.
37. Norell MS, Sarvasvaran R, Sutton GC. Solitary tumour metastasis: a rare cause of right ventricular outflow tract obstruction and sudden death. *Eur Heart J* 1984;5:684-8.

38. Przybojewski JZ. Primary cardiac hydatid disease. A case report. *S Afr Med J* 1984;65:438-42.
39. Warnes CA, Maron BJ, Jones M, Roberts WC. Asymptomatic sinus of Valsalva aneurysm causing right ventricular outflow obstruction before and after rupture. *Am J Cardiol* 1984;54:1383-4.
40. Come PC, Come SE, Riley MF, Carl LV, Nakao S. Reversible right ventricular outflow tract compression by immunoblastic sarcoma. *Am J Cardiol* 1985;55:239-40.
41. Desai AG, Sharma S, Kumar A, Hansoti RC, Kalke BR. Echocardiographic diagnosis of unruptured aneurysm of right sinus of Valsalva: an unusual cause of right ventricular outflow obstruction. *Am Heart J* 1985;109:363-4.
42. Nishimura RA, Kazmier FJ, Smith HC, Danielson GK. Right ventricular outflow obstruction caused by constrictive pericardial disease. *Am J Cardiol* 1985;55:1447-8.
43. Shemin RJ, Marsh JD, Schoen FJ. Benign intracardiac thyroid mass causing right ventricular outflow tract obstruction. *Am J Cardiol* 1985;56:828-9.
44. Antonelli G, Chiddo A, Bortone A, Iliceto S, Rizzon P. Hydatid cyst of the interventricular septum causing obstruction of the right ventricular outflow tract: cross-sectional echocardiographic, angiographic and pathological findings. *Eur Heart J* 1986;7:1083-5.
45. Hara K, Ohno M, Takenaga M, et al. [Metastatic thyroid cancer to the right ventricle causing obstruction of the right ventricular outflow tract and associated with disseminated intravascular coagulopathy: a case report]. *J Cardiogr* 1986;16:765-73.

46. Kiefaber RW, Tabakin BS, Coffin LH, Gibson TC. Unruptured sinus of Valsalva aneurysm with right ventricular outflow obstruction diagnosed by two-dimensional and Doppler echocardiography. *J Am Coll Cardiol* 1986;7:438-42.
47. Talley JD, Franch RH, Clements SD, Murphy DA, Sewell CW. Primary right ventricular leiomyosarcoma producing outflow tract obstruction. *Am Heart J* 1986;112:1335-8.
48. Velebit V, von Segesser L, Gabathuler J, Jornod J, Faidutti B. Right ventricular outflow obstruction after radiation therapy. *J Thorac Cardiovasc Surg* 1986;92:153-5.
49. Emmot WW, Vacek JL, Agee K, Moran J, Dunn MI. Metastatic malignant melanoma presenting clinically as obstruction of the right ventricular inflow and outflow tracts. Characterization by magnetic resonance imaging. *Chest* 1987;92:362-4.
50. Grigg LE, Downey W, Tatoulis J, Hunt D. Benign congenital intracardiac thyroid and polycystic tumor causing right ventricular outflow tract obstruction and conduction disturbance. *J Am Coll Cardiol* 1987;9:225-7.
51. Stierle U, Sheikhzadeh A, Shakibi JG, Langbehn AF, Diederich KW. Right ventricular obstruction in various types of hypertrophic cardiomyopathy. *Jpn Heart J* 1987;28:115-25.
52. Bartels P, O'Callaghan WG, Peyton R, Sethi G, Maley T. Metastatic liposarcoma of the right ventricle with outflow tract obstruction: restrictive pathophysiology predicts poor surgical outcome. *Am Heart J* 1988;115:696-8.
53. Vallance PJ, Gray HH, Oldershaw PJ. Diagnostic features of localised pericardial constriction. *Int J Cardiol* 1988;20:416-9.

54. Israeli A, Rein AJ, Krivisky M, Libson E, Uziely B, Michaeli J. Right ventricular outflow tract obstruction due to extracardiac tumors. A report of three cases diagnosed and followed up by echocardiographic studies. *Arch Intern Med* 1989;149:2105-6.
55. Frenes SE, Patterson GA, Williams WG, Goldman BS, Todd TR, Maurer J. Single lung transplantation and closure of patent ductus arteriosus for Eisenmenger's syndrome. Toronto Lung Transplant Group. *J Thorac Cardiovasc Surg* 1990;100:1-5.
56. Haraphongse M, Ayudhya RK, Jugdutt B, Rossall RE. Isolated unruptured sinus of Valsalva aneurysm producing right ventricular outflow obstruction. *Cathet Cardiovasc Diagn* 1990;19:98-102.
57. Kamlow FJ, Padaria SF, Wainwright RJ. Metastatic cardiac malignant fibrous histiocytoma presenting as right ventricular outflow tract obstruction. *Clin Cardiol* 1991;14:173-5.
58. Reiss N, Theissen P, Feaux de Lacroix W. Right-ventricular hemangioma causing serious outflow-tract obstruction. *Thorac Cardiovasc Surg* 1991;39:234-6.
59. Labib SB, Schick EC, Jr., Isner JM. Obstruction of right ventricular outflow tract caused by intracavitary metastatic disease: analysis of 14 cases. *J Am Coll Cardiol* 1992;19:1664-8.
60. Agrawal NB, Khandeparkar JM, Oswal D, Hemantkumar CJ, Tendolkar AG, Magotra RA. Surgical correction of aneurysms of sinus of Valsalva--a report of 22 cases. *Indian Heart J* 1993;45:479-82.
61. Gorcsan J, 3rd, Reddy SC, Armitage JM, Griffith BP. Acquired right ventricular outflow tract obstruction after lung transplantation: diagnosis by transesophageal echocardiography. *J Am Soc Echocardiogr* 1993;6:324-6.

62. Carroll JC, Quinn CC, Weitzel J, Sant GR. Metastatic renal cell carcinoma to the right cardiac ventricle without contiguous vena caval involvement. *J Urol* 1994;151:133-4.
63. Ignaszewski AP, Collins-Nakai RL, Kasza LA, Gulamhussein SS, Penkoske PA, Taylor DA. Aneurysm of the membranous ventricular septum producing subpulmonic outflow tract obstruction. *Can J Cardiol* 1994;10:67-70.
64. Mukadam ME, Kulkarni HL, Kumar CJ, Tendolkar AG. Right-ventricular myxoma presenting as right-ventricular outflow-tract obstruction--case report and review of the literature. *Thorac Cardiovasc Surg* 1994;42:243-6.
65. Ritchie ME, Davila-Roman VG, Barzilai B. Dynamic right ventricular outflow obstruction after single-lung transplantation. Biplane transesophageal echocardiographic findings. *Chest* 1994;105:610-1.
66. Tardif JC, Taylor K, Pandian NG, Schwartz S, Rastegar H. Right ventricular outflow tract and pulmonary artery obstruction by postoperative mediastinal hematoma: delineation by multiplane transesophageal echocardiography. *J Am Soc Echocardiogr* 1994;7:400-4.
67. Kroshus TJ, Kshetry VR, Hertz MI, Everett JE, Bolman RM, 3rd. Suicide right ventricle after lung transplantation for Eisenmenger syndrome. *Ann Thorac Surg* 1995;59:995-7.
68. Calderon M, Galvan J, Negri V, Verdin R. Right ventricular bypass for palliation of cardiac sarcoma. *Texas Heart Inst J* 1996;23:178-9.
69. Kasprzak JD, Religa W, Krzeminska-Pakula M, Marszal-Marciniak M, Zaslonka J, Pawlowski W. Right ventricular outflow tract obstruction by cardiac metastasis as the first manifestation of follicular thyroid carcinoma. *J Am Soc Echocardiogr* 1996;9:733-5.

70. Kirshbom PM, Tapson VF, Harrison JK, Davis RD, Gaynor JW. Delayed right heart failure following lung transplantation. *Chest* 1996;109:575-7.
71. Soejima Y, Niwa A, Tanaka M, et al. Large right ventricular myxoma in a 79-year-old male. *Intern Med* 1996;35:380-2.
72. Balkin PW, Imoto EM. Treatment of malignant obstruction of the right ventricular outflow tract and pulmonary artery with metallic stents. *AJR. Am J Roentgenol* 1997;169:439-40.
73. Henderson W, Huckell VF, English JC, Fradet G. Right outflow tract obstruction by a pedunculated neurofibroma: case report and literature review. *Can J Cardiol* 1997;13:387-90.
74. Ng AF, Olak J. Pericardial cyst causing right ventricular outflow tract obstruction. *Ann Thorac Surg* 1997;63:1147-8.
75. Sebastian C, Knott-Craig CJ, Chandrasekaran K, Sivaram CA, Kugelmass AD, Lazzara R. Giant coronary artery pseudoaneurysm causing pulmonary artery obstruction: a rare complication of coronary bypass surgery--a case report. *Angiology* 1997;48:1073-8.
76. Yilmaz AT, Demirkilic U, Ozal E, Tatar H, Ozturk OY. Aneurysms of the sinus of Valsalva. *J Cardiovasc Surg (Torino)* 1997;38:119-24.
77. Esaki M, Kagawa K, Noda T, et al. Primary cardiac leiomyosarcoma growing rapidly and causing right ventricular outflow obstruction. *Intern Med* 1998;37:370-5.
78. Sugi K, Yoshimura K, Fujita N, Ueda K, Nawata K, Esato K. Obstruction of the right ventricle outflow tract during right cardiac prolapse. *Jpn J Thorac Cardiovasc Surg* 1998;46:131-3.

79. Wankmuller H, Seitz K, Seitz G. Cardiac metastasis of a malignant fibrous histiocytoma occupying the right ventricle and infiltrating the myocardium. *Ultraschall Med* 1998;19:139-41.
80. Halcox JP. Non-surgical CHOP cures right ventricular outflow obstruction. *Heart* 1999;81:445-6.
81. Marques KM, De Cock CC, Visser CA. Isolated unruptured aneurysm of the right sinus of Valsalva causing right ventricular outflow obstruction. *Heart* 1999;81:447-8.
82. Van Camp G, De Mey J, Daenen W, Budts W, Schoors D. Pulmonary stenosis caused by extrinsic compression of an aortic pseudoaneurysm of a composite aortic graft. *J Am Soc Echocardiogr* 1999;12:997-1000.
83. Beaver TA, Robb JF, Teufel EJ, Malenka DJ, Palac RT. Right Ventricular Outflow Tract Obstruction in an Older Woman: Facilitated Diagnosis with Transesophageal Echocardiography–Guided Biopsy. *J Am Soc Echocardiogr* 2000;13:622-5.
84. Casanova JB, Daly RC, Edwards BS, Tazelaar HD, Thompson GB. Intracardiac ectopic thyroid. *Ann Thorac Surg* 2000;70:1694-6.
85. Gopal AS, Arora NS, Messineo FC. Right ventricular myxoma. *N Engl J Med* 2000;342:295.
86. Kann BR, Kim WJ, Cilley JH, Jr., Marra SW, DelRossi AJ. Hemangioma of the right ventricular outflow tract. *Ann Thorac Surg* 2000;70:975-7.
87. Kono T, Takemura T, Hagino I, Matsumura G. Complete resection of cardiac leiomyosarcoma extending into the pulmonary trunk and right pulmonary artery. *Ann Thorac Surg* 2000;70:1412-4.
88. McElhinney DB, Chatterjee KM, Reddy VM. Double-chambered right ventricle presenting in adulthood. *Ann Thorac Surg* 2000;70:124-7.



89. Murakawa T, Takamoto S, Ezure M, Ono M, Kawauchi M, Tanaka O. Metastatic hepatocellular carcinoma obstructing the right ventricular outflow tract. *Jpn J Thorac Cardiovasc Surg* 2000;48:516-9.
90. Zakynthinos EG, Kontogianni DD, Mpalafouta ME, Vassilakopoulos T. Right ventricular outflow obstruction caused by non-small cell lung carcinoma. *Int J Cardiol* 2000;75:313-4.
91. Hayashi S, Tojyo K, Uchikawa S, et al. Biventricular hypertrophic cardiomyopathy with right ventricular outflow tract obstruction associated with Noonan syndrome in an adult. *Jpn Circ J* 2001;65:132-5.
92. Katoh H, Murakami R, Shimada T. Cine magnetic resonance imaging of isolated right ventricular outflow obstruction in hypertrophic cardiomyopathy. *Clin Radiol* 2001;56:516-9.
93. Krishnamoorthy KM, Desai NB. Myxoma producing right-sided inflow and outflow obstruction. *Int J Cardiol* 2001;79:325-6.
94. Willaert W, Claessens P, Shoja A, et al. Ventricular outflow tract obstruction secondary to leiomyosarcoma of the right ventricle. *Jpn Heart J* 2001;42:377-86.
95. Agarwal S, Choudhary S, Saxena A, Ray R, Airan B. Giant pulmonary artery aneurysm with right ventricular outflow tract obstruction. *Indian Heart J* 2002;54:77-9.
96. Doshi SN, Kim MC, Sharma SK, Fuster V. Images in cardiovascular medicine. Right and left ventricular outflow tract obstruction in hypertrophic cardiomyopathy. *Circulation* 2002;106:e3-4.
97. Gersak B, Lakic N, Gorjup V, Gulic T, Berden P, Cernic NS. Right ventricular metastatic choriocarcinoma obstructing inflow and outflow tract. *Ann Thorac Surg* 2002;73:1631-3.

- 98.** Youn HJ, Jung SE, Chung WS, et al. Obstruction of right ventricular outflow tract by extended cardiac metastasis from esophageal cancer. *J Am Soc Echocardiogr* 2002;15:1541-4.
- 99.** Denault A, Ferraro P, Couture P, et al. Transesophageal echocardiography monitoring in the intensive care department: the management of hemodynamic instability secondary to thoracic tamponade after single lung transplantation. *J Am Soc Echocardiogr* 2003;16:688-92.
- 100.** Mohanakrishnan L, Vijayakumar K, Sukumaran P, et al. Unruptured sinus of Valsalva aneurysm with right ventricular outflow obstruction. *Asian Cardiovasc Thorac Ann* 2003;11:74-6.
- 101.** Paraskevaidis IA, Triantafilou K, Karatzas D, Kremastinos DT. Right ventricular multiple myxomas obstructing right ventricular outflow tract. *J Thorac Cardiovasc Surg* 2003;126:913-4.
- 102.** Shimizu M, Kawai H, Yokota Y, Yokoyama M. Echocardiographic assessment of right ventricular obstruction in hypertrophic cardiomyopathy. *Circ J* 2003;67:855-60.
- 103.** Thankachen R, Gnanamuthu R, Doshi H, Shukla V, Korula RJ. Unruptured aneurysm of the sinus of Valsalva presenting with right ventricular outflow obstruction. *Texas Heart Inst J* 2003;30:152-4.
- 104.** Yamada N, Minato N, Ikeda K, Shimokawa T, Hisamatsu Y. Surgical treatment of primary pulmonary artery tumor: two cases of malignant fibrous histiocytoma and leiomyosarcoma. *Jpn J Thorac Cardiovasc Surg* 2003;51:557-61.
- 105.** Anbarasu M, Krishna Manohar SR, Titus T, Neelakandhan KS. One-and-a-half ventricle repair for right ventricular endomyocardial fibrosis. *Asian Cardiovasc Thorac Ann* 2004;12:363-5.

106. Baweja G, Nanda NC, Nekkanti R, Dod H, Ravi B, Fadel A. Three-dimensional transesophageal echocardiographic delineation of ventricular septal aneurysm producing right ventricular outflow obstruction in an adult. *Echocardiography* 2004;21:95-7.
107. Gunes Y, Erbas C, Okcun B, Babalik E. A case of ventricular septal aneurysm producing right ventricular outflow obstruction in an adult patient. *Anadolu Kardiyol Derg* 2004;4:346-7.
108. Miyaji K, Matsubara H, Kajiyama M, et al. Failure of disopyramide to improve right ventricular outflow tract obstruction after living-donor lobar lung transplantation. *Circ J* 2004;68:1084-7.
109. Rastan AJ, Walther T, Mohr FW, Kostelka M. Leiomyosarcoma--an unusual cause of right ventricular outflow tract obstruction. *Thorac Cardiovasc Surg* 2004;52:376-7.
110. Sharda A, Yadava OP, Dubey S, Ghadiok R. Unruptured sinus of valsalva aneurysm presenting as acute coronary syndrome. *Indian Heart J* 2004;56:155-7.
111. Totaro M, Miraldi F, Ghibellini C, Biscosi C. Cardiac angiosarcoma arising from pulmonary artery: endovascular treatment. *Ann Thorac Surg* 2004;78:1468-70.
112. Brestas PS, Malagari KS, Kelekis DA. Rare right ventricular myxoma detected incidentally on a FAST examination. *J Clin Ultrasound* 2005;33:143-5.
113. Iba Y, Watanabe S, Akimoto T, Abe K, Koyanagi H. Pedicled cardiac hemangioma with right ventricular outflow tract obstruction. *Jpn J Thorac Cardiovasc Surg* 2005;53:269-71.

114. Ichinose T, Nakazato Y, Miyano H, et al. Severe infundibular pulmonary stenosis and coronary artery stenosis with ventricular tachycardia 24 years after mediastinal irradiation. *Intern Med* 2005;44:963-6.
115. Ishikawa K, Takanashi S, Mihara W, Fukui T, Hosoda Y. Surgical treatment for primary cardiac leiomyosarcoma causing right ventricular outflow obstruction. *Circ J* 2005;69:121-3.
116. Karagounis A, Sarsam M. Myxoma of the free wall of the right ventricle: a case report. *J Card Surg* 2005;20:73-6.
117. Prabhakar A, Dalmia RS, Gaur N, Khurana P, Trehan N. Isolated thrombus-producing right ventricular outflow tract obstruction: an unusual presentation of primary antiphospholipid antibody syndrome. *Indian Heart J* 2005;57:744-6.
118. Atik FA, Navia JL, Krishnamurthi V, et al. Solitary massive right ventricular metastasis of renal cell carcinoma without inferior vena cava or right atrium involvement. *J Card Surg* 2006;21:304-6.
119. Bhavani SS, Slisatkorn W, Rehm SJ, Pettersson GB. Deep sternal wire infection resulting in severe pulmonary valve endocarditis. *Ann Thorac Surg* 2006;82:1111-3.
120. Chiu KM, Lin TY, Li SJ, Chan CY, Chu SH. Hybrid pulmonary artery conduit angioplasty for heterotopic heart transplantation. *Transplant Proc* 2006;38:1538-40.
121. Daccarett M, Burke P, Saba S. Incidental finding of a large pulmonary valve fibroelastoma: a case report. *Eur J Echocardiogr* 2006;7:253-6.
122. Denault AY, Chaput M, Couture P, Hebert Y, Haddad F, Tardif JC. Dynamic right ventricular outflow tract obstruction in cardiac surgery. *J Thorac Cardiovasc Surg* 2006;132:43-9.

123. Kholeif MA, Tahir ME, Kholeif YA, Watidy AE. An unusual aneurysm of the main pulmonary artery presenting as acute coronary syndrome. *Cardiovasc Intervent Radiol* 2006;29:911-4.
124. May M, Finkbeiner Y, Gunia S, Seehafer M, Knorig J, Hetzer R. Metastasizing testicular germ-cell tumor with infiltration of the right heart: indication for primary metastasectomy. *Heart Vessels* 2006;21:63-5.
125. Rosenberger P, Cohn LH, Fox JA, Locke A, Sherman SK. Sinus of valsalva aneurysm obstructing the right ventricular outflow tract. *Anesth Analg* 2006;102:1660-1.
126. Bouzas-Mosquera A, Flores-Rios X, Aldama G. Primary cardiac rhabdomyosarcoma causing obstruction to the right ventricular outflow. *Eur J Echocardiogr* 2007;8:406-7.
127. Gelfand EV, Bzymek D, Johnstone MT. Images in cardiovascular medicine. Sinus of Valsalva aneurysm with right ventricular outflow tract obstruction: evaluation with Doppler, real-time 3-dimensional and contrast echocardiography. *Circulation* 2007;115:e16-7.
128. Krecki R, Lipiec P, Piotrowska-Kownacka D, et al. Predominant, severe right ventricular outflow tract obstruction in hypertrophic cardiomyopathy. *Circulation* 2007;116:e551-3.
129. Murakami T, Komiya A, Mikata K, Kaneko S, Ikeda I. Cardiac metastasis of renal pelvic cancer. *Int J Urol* 2007;14:240-1.
130. Ozbek C, Emrecaan B, Calli AO, Gurbuz A. Intimal sarcoma of the pulmonary artery with retrograde extension into the pulmonic valve and right ventricle. *Texas Heart Inst J* 2007;34:119-21.
131. Sayin OA, Ugurlucan M, Cinar T, et al. Right ventricular myxoma causing right ventricular outflow tract obstruction. *J Card Surg* 2007;22:227-9.

132. Aktoz M, Tatli E, Ege T, et al. Cardiac rhabdomyoma in an adult patient presenting with right ventricular outflow tract obstruction. *Int J Cardiol* 2008;130:e105-7.
133. Butz T, Horstkotte D, Langer C, et al. Significant obstruction of the right and left ventricular outflow tract in a patient with biventricular hypertrophic cardiomyopathy. *Eur J Echocardiogr* 2008;9:344-5.
134. Coskun ST, Coskun KO, Popov AF, et al. Reoperations in adults after correction of tetralogy of Fallot. *ASAIO J* 2008;54:556-7.
135. Goksel OS, Badem S, Kaya AB, Tireli E, Dayioglu E. Aneurysm of right ventricular outflow tract with pulmonic stenosis 28 years after atrial septal defect repair. *Anadolu Kardiyol Derg* 2008;8:E5-6.
136. Nishida K, Fukuyama O, Nakamura DS. Pulmonary valve endocarditis caused by right ventricular outflow obstruction in association with sinus of valsalva aneurysm: a case report. *J Cardiothorac Surg* 2008;3:46.
137. Omura A, Tobe S, Yoshida K, Yamaguchi M. Surgical treatment for recurrent pulmonary artery sarcoma. *Gen Thorac Cardiovasc Surg* 2008;56:28-31.
138. Rigatelli G, Cardaioli P, Dell'Avvocata F, Giordan M, Roncon L. Transcatheter-covered stent implantation in an unusual post-surgical right ventricle outflow tract stenosis. *Eur Heart J* 2008;29:1078.
139. Yang Y, Zhou Y, Ma L, Ni Y. Unruptured aneurysm of the sinus of Valsalva presenting with thrombosis and right ventricular outflow obstruction. *J Card Surg* 2008;23:782-4.
140. Agarwal R, Kumar N, Dixit S, Verma RK, Krishna V, Sahni JL. Hydatid cyst in the right ventricular outflow tract: Successful surgical outcome of a rare entity. *Indian J Thorac Cardiovasc Surg* 2009;25:40-2.

141. Bijulal S, Sivasankaran S, Sanjay G, Tharakan J. Membranous septal aneurysm: an unusual cause for right ventricular outflow tract obstruction in a malaligned ventricular septal defect with aortomitral discontinuity (double-outlet right ventricle) associated with visceral heterotaxy. *Pediatr Cardiol* 2009;30:200-2.
142. Chen F, Hanaoka N, Hasegawa S, et al. Right ventricular outflow tract obstruction after bilateral lung transplantation. *Thorac Cardiovasc Surg* 2009;57:48-50.
143. Chue CD, Hudsmith LE, Thorne SA, Clift P. Infected thrombus compression of the right ventricular outflow tract in transposition of the great arteries. *Eur J Echocardiogr* 2009;10:168.
144. Farand P, Brochu MC, Gervais A, Mueller X. Familial unruptured sinus of Valsalva aneurysm obstructing the right ventricular outflow tract. *Can J Cardiol* 2009;25:227-8.
145. Lee SH, Kim WH, Choi JB, et al. Huge primary pleomorphic leiomyosarcoma in the right ventricle with impending obstruction of both inflow and outflow tracts. *Circ J* 2009;73:779-82.
146. Martin M, Luyando LH, Moris C. Pulmonary infundibular stenosis and ventricular septum defect: usefulness of cardiac CT. *Acta Cardiol* 2009;64:269-70.
147. Ozer N, Deveci OS, Kaya EB, Demircin M. Mediastinal lymphoma causing extrinsic pulmonary stenosis. *Turk Kardiyol Dern Ars* 2009;37:421-4.
148. Avci A, Akcakoyun M, Alizada E, et al. Severe right ventricular outflow obstruction by right sinus of valsalva aneurysm. *Echocardiography* 2010;27:341-3.

149. Ivanovic B, Tadic M, Matic D, Simic D. Right ventricular myxoma obstructing the outflow tract. *Am Heart Hosp J* 2010;8:E118-21.
150. Khouzam RN, Dearani JA, Julsrud PR. Ebstein's malformation presenting with tricuspid stenosis: 1-year follow-up after surgical repair. *Cardiol Young* 2010;20:80-5.
151. Lee C, Lee CH, Kwak JG, Park CS. Isolated accessory tricuspid valve causing right ventricular outflow tract obstruction. *J Card Surg* 2010;25:410-1.
152. Recupero A, Di Bella G, Patane S, et al. Right ventricular outflow tract obstruction in hypertrophic cardiomyopathy. *Int J Cardiol* 2010;144:e56-7.
153. Rosu C, Basile F, Prieto I, Noiseux N. Unusual presentation of an isolated unruptured aneurysm of the right sinus of Valsalva causing compression of the right ventricular outflow tract. *Eur J Cardiothorac Surg* 2010;38:504.
154. Takigawa M, Nakatani S, Hashimura K, et al. An elderly case of right ventricular outflow obstruction precisely diagnosed and successfully treated with surgical repair. *Intern Med* 2010;49:563-7.
155. Vida VL, Speggorin S, Maschietto N, et al. Surgical re-utilization of a pulmonary valve graft after failed percutaneous treatment. *J Heart Valve Dis* 2010;19:260-2.
156. Chaudhry I, Bojal S, Poovathumkadavil A, Amr SS. Role of surgery after chemotherapy in B-cell lymphoma of thymus causing airway compression and right ventricle outflow tract obstruction. *Ann Thorac Surg* 2011;92:1120-2.
157. Chen SY, Chan KL, Beauchesne LM. Right ventricular outflow tract obstruction secondary to a membranous ventricular septal aneurysm. *Eur J Echocardiogr* 2011;12:886.



158. Darwazah AK, Eida M, Bader V, Khalil M. Surgical management of double-chambered right ventricle in adults. *Texas Heart Inst J* 2011;38:301-4.
159. Gajjar TP, Shah GB, Desai NB. Giant ventricular myxoma obstructing right ventricular outflow tract. *Rev Bras Cir Cardiovasc* 2011;26:663-6.
160. Garg N, Moorthy N, Agrawal SK, Pandey S, Kumari N. Delayed cardiac metastasis from phyllodes breast tumor presenting as cardiogenic shock. *Texas Heart Inst J* 2011;38:441-4.
161. Shah DK, Joyce LD, Grogan M, et al. Recurrent pulmonary intimal sarcoma involving the right ventricular outflow tract. *Ann Thorac Surg* 2011;91:e41-2.
162. Tsang FH, Cheng LC. Giant myxoma causing right ventricular outflow tract obstruction. *Hong Kong Med J* 2011;17:242-4.
163. Gil-Jaurena JM, Cano J, Cuenca V. Transaortic Fallot repair in a grown-up patient: advantages in a situs inversus setting. *Cardiol Young* 2012;22:603-5.
164. Guo HW, Xiong H, Xu JP, Wang XQ, Hu SS. Surgical correction for sinus of valsalva aneurysm with right ventricular outflow tract stenosis. *J Card Surg* 2012;27:99-102.
165. Matsushita T, Masuda S, Inoue T, Usui K, Yamagishi M. Deformities of pulmonary and aortic annulus 42 years after repair of tetralogy of Fallot. *Ann Thorac Cardiovasc Surg* 2012;18:48-50.
166. Obert L, Munyon R, Choe A, Rubenstein J, Azizkhan R. Rare late complication of the Nuss procedure: a case report. *J Pediatr Surg* 2012;47:593-7.

167. Pemberton J, Raudkivi P. Right ventricular myxoma causing pulmonary outflow tract obstruction. *Interact Cardiovasc Thorac Surg* 2012;14:362-3.
168. Rao N, Gajjar T, Desai N. Accessory mitral valve tissue: an unusual cause of congenital mitral stenosis. *Interact Cardiovasc Thorac Surg* 2012;14:110-2.
169. Sogawa M, Fukuda T, Tayama M, Moro H, Ishihara N. Reconstruction of the right ventricular outflow tract after surgical removal of a cardiac hemangioma. *Gen Thorac Cardiovasc Surg* 2012;60:661-3.
170. Tamenishi A, Matsumura Y, Okamoto H. Malignant fibrous histiocytoma originating from right ventricular outflow tract. *Asian Cardiovasc Thorac Ann* 2012;20:702-4.
171. Tsubota H, Nakamura T. Surgical correction of tetralogy of Fallot in a 61-year-old patient. *Gen Thorac Cardiovasc Surg* 2012;60:161-3.
172. Yagoub H, Srinivas BP, McCarthy J, Kiernan TJ. Gigantic unruptured sinus of Valsalva aneurysm presenting as an incidental murmur. *BMJ Case Rep* 2012;2012.
173. Altunbas G, Gokaslan G, Ercan S, Davutoglu V, Deniz H. Contribution of giant aneurysm of a membranous ventricular septal defect to right ventricular outflow tract obstruction. *Thorac Cardiovasc Surg* 2013;61:320-2.
174. Antonetti I, Lorch D, Coe B, et al. Unrepaired tetralogy of fallot with major aortopulmonary collateral arteries in an adult patient. *Congenit Heart Dis* 2013;8:E24-30.
175. Bhat DP, Forbes TJ, Aggarwal S. A case of life-threatening *Staphylococcus aureus* endocarditis involving percutaneous transcatheter prosthetic pulmonary valve. *Congenit Heart Dis* 2013;8:E161-4.

- 176.** Brown MR, Dettrick A, Javorsky G, McKenzie SC, Platts DG. Indolent cardiac angioma mimicking hypertrophic obstructive cardiomyopathy and causing right ventricular outflow tract obstruction. *Eur Heart J Cardiovasc Imaging* 2013;14:718.
- 177.** Dryzek P, Goreczny S, Moszura T, et al. Right ventricular outflow tract giant pseudoaneurysm: percutaneous approach and complications. *Kardiol Pol* 2013;71:1076-8.
- 178.** Fontana A, Corsi D, Vigano E, Trocino G, Achilli F. Added value of real time three-dimensional echocardiography in the diagnosis of an apical right ventricular metastasis from malignant melanoma. *Echocardiography* 2013;30:E16-20.
- 179.** Gavali SA, Phadke MS, Kerkar PG, Nabar AA, Nyayadhish PY, Lanjewar CP. Unruptured aneurysm of the sinus of valsalva presenting with right ventricular outflow tract obstruction, complete heart block, and protrusion into left ventricular outflow tract: a rare combination. *J Am Coll Cardiol* 2013;61:e169.
- 180.** Minagawa T, Watanabe S, Kanda K, Miura M, Tabayashi K. Surgical treatment for an asymptomatic and unruptured sinus of Valsalva aneurysm: report of a case. *Surg Today* 2013;43:1199-201.
- 181.** Mohsen A, Rahman F, Ikram S. Anomalous muscle bundles causing double-chambered right ventricle in adults. *J Invasive Cardiol* 2013;25:E212-3.
- 182.** Obrenovic-Kircanski B, Mikic A, Velinovic M, et al. Right ventricular myxoma - a case report. *Vojnosanit Pregl* 2013;70:609-11.
- 183.** Sah S, Berdjis F, Valdez S, Gates R. Pseudoaneurysm of surgically reconstructed right ventricular outflow tract. *World J Pediatr Congenit Heart Surg* 2013;4:116-9.

- 184.** Yousif M, Elhassan NB, Ali SK, Ahmed Y. Isolated subpulmonic fibrous ring, mirror-image dextrocardia and situs solitus in a young lady unreported and a near miss. *Interact Cardiovasc Thorac Surg* 2013;17:1043-4.
- 185.** Zanotti G, Hartwig MG, Davis RD. A simplified technique for pulmonary artery aneurysm repair in a lung transplant recipient with right ventricular outflow tract obstruction. *J Thorac Cardiovasc Surg* 2013;145:295-6.
- 186.** Bang SH, Park JB, Chee HK, et al. Cardiac parasitic infection in trichinellosis associated with right ventricle outflow tract obstruction. *Korean J Thorac Cardiovasc Surg* 2014;47:145-8.
- 187.** Bruckner BA, Rodriguez LE, Bunge R, et al. Large cardiac tumor managed with resection and two ventricular assist devices. *Ann Thorac Surg* 2014;97:321-4.
- 188.** Chen C, Gu J, Meng W, et al. Intraoperative evaluation of right ventricular outflow tract myxoma by real time three-dimensional transesophageal echocardiography. *Echocardiography* 2014;31:E174-6.
- 189.** Cheng A, Thomas J, Vermilion RP, Alfieris GM, Hicks GL. Right ventricular outflow tract obstruction after sinus of valsalva aneurysm repair. *J Card Surg* 2014;29:317-9.
- 190.** Kokotsakis J, Rouska EG, Harling L, et al. Right ventricular outflow tract obstruction caused by double-chambered right ventricle presenting in adulthood. *Texas Heart Inst J* 2014;41:425-8.
- 191.** Le DD, Orrego CM, Maragiannis D, Chang SM. An unusual case of right-sided heart failure caused by giant sinus of Valsalva aneurysm obstructing right ventricular outflow tract. *Eur Heart J* 2014;35:2721.
- 192.** Madeo A, Pino PG, Pergolini A, Chialastri C, Buffa V. An unusual right ventricle outflow obstruction in adult. *Anadolu Kardiyol Derg* 2014;14:E9-10.

- 193.** Malik R, Maron MS, Rastegar H, Pandian NG. Hypertrophic cardiomyopathy with right ventricular outflow tract and left ventricular intracavitary obstruction. *Echocardiography* 2014;31:682-5.
- 194.** Patel N, Rousan TA, Peyton MD, Sivaram CA. Two different presentations of sinus of valsalva aneurysm. *Echocardiography* 2014;31:E181-4.
- 195.** Ramakrishnan S, Bhargava B, Seth S, Airan B. Alcohol ablation of right ventricular outflow tract obstruction. *JACC Cardiovasc Interv* 2014;7:443-5.
- 196.** Song L, Wang L, Huang WC, Zhou XM, Hu JG, Liu LM. Primary leiomyoma: a rare space occupying lesion in the right ventricle. *Ann Thorac Surg* 2014;97:324-6.
- 197.** Urban M, Besik J, Szarszoi O, Voska L, Netuka I. Right ventricular outflow tract obstruction caused by ectopic thyroid gland. *Ann Thorac Surg* 2014;98:345.
- 198.** Yam N, Au TW. Right ventricular outflow tract obstruction by a pedunculated cardiac hemangioma: a rare case of syncope. *J Card Surg* 2014;29:351-2.
- 199.** Buys DG, Greig C, Brown SC. First Melody((R)) valve implantations in Africa. *Cardiovasc J Af* 2015;26:196-9.
- 200.** Chaudhry-Waterman N, Bergersen L, Buber J. Bacterial Endocarditis Manifesting as Outflow Tract Obstruction in Two Patients Implanted With Percutaneous Prosthetic Pulmonary Valves. *Can J Cardiol* 2015;31:1204 e1201-3.
- 201.** Das S, Ladha S, Airan B. Unruptured Sinus of Valsalva Aneurysm with Right Ventricular Outflow Tract Obstruction and Ventricular Septal Defect--A Rare Combination. *Echocardiography* 2015;32:1322-4.

- 202.** Mahesh SK, Kumar S, Satheesh S, Jayaraman B. Real time three-dimensional transesophageal echocardiography demonstration of membranous septal aneurysm causing severe right ventricular outflow tract obstruction. *Echocardiography* 2015;32:184-6.
- 203.** Mohan JC, Mohan V. Bilateral outflow obstructions without ventricular septal defect in an adult: Illustrated by real-time 3D echocardiography. *Indian Heart J* 2015;67:371-4.
- 204.** Mori M, Siddharthan R, Kogon B. Extra-anatomic right ventricle to pulmonary artery conduit: the apical-aortic equivalent for complex right ventricular outflow tract reconstruction. *Ann Thorac Surg* 2015;99:1058-60.
- 205.** Moustafa S, Patton DJ, Alvarez N, et al. Double chambered right ventricle with ventricular septal defect in adults: case series and review of the literature. *J Cardiovasc Ultrasound* 2015;23:48-51.
- 206.** Omar HR, Mangar D, Fattouch T, Gibbs JD, Camporesi EM. Extracavitary cardiac carcinoid presenting with right ventricular outflow tract obstruction. *Eur Heart J Cardiovasc Imaging* 2015;16:345.
- 207.** Osada H, Kyogoku M, Fujino T, Nakajima H. Partial aortic root replacement for aneurysm of the right sinus of Valsalva. *Asian Cardiovasc Thorac Ann* 2015;23:570-2.
- 208.** Rier JD, Schoepf UJ, Renker M, Baumann S, Powers ER. Aortocoronary saphenous vein graft aneurysm causing high-gradient right ventricular outflow tract obstruction. *Eur Heart J Cardiovasc Imaging* 2015;16:117.
- 209.** Sridhar GS, Sadiq MA, Ahmad WA, et al. Unruptured Sinus of Valsalva Aneurysm with Right Ventricular Outflow Tract Obstruction and Supracristal Ventricular Septal Defect: A Rare Case. *Texas Heart Inst J* 2015;42:462-4.

210. Torres A, Sanders SP, Vincent JA, et al. Iatrogenic aortopulmonary communications after transcatheter interventions on the right ventricular outflow tract or pulmonary artery: Pathophysiologic, diagnostic, and management considerations. *Catheter Cardiovasc Interv* 2015;86:438-52.
211. Wang Y, Ma C, Yang J, Gu T. Incomplete excision or postoperative hematoma: primary right ventricular intramyocardial lipoma involving the right ventricular outflow tract. *J Med Ultrason (2001)* 2015;42:541-5.
212. Abu Saleh WK, Lin CH, Reardon MJ, Ramlawi B. Right Ventricular Outflow Tract Obstruction Caused by Isolated Sinus of Valsalva Aneurysm. *Texas Heart Inst J* 2016;43:357-9.
213. Caldeira CC, Sayad D, Strosberg J, Faber C, Saouma S, Michaud T. Surgical Treatment of an Isolated Metastatic Myocardial Neuroendocrine Tumor. *Ann Thorac Surg* 2016;101:747-9.
214. Demirel M, Acar E, Toprak C. Case images: Significant obstruction of right outflow tract caused by double-chambered right ventricle. *Turk Kardiyol Dern Ars* 2016;44:274.
215. Higashi H, Inaba S, Izutani H, Sumimoto T. An unusual cause of life-threatening right-sided heart failure: undifferentiated pleomorphic sarcoma in the right ventricular outflow tract. *Eur Heart J* 2016;37:1002.
216. Kim HY, Baek SH, Yoon JU, Lee DH, Byeon GJ, Ahn JH. Cardiac arrest during radical nephrectomy due to a mass in the right ventricular outflow tract. *J Clin Anesth* 2016;33:156-9.
217. Musuku SR, Devejian N, Pani S, Kassel K. Biventricular Outflow Tract Obstruction After a Rastelli Repair. *Anesth Analg* 2016;122:1305-8; discussion 1308.

218. Naqvi SY, Henry D, Furukawa S, Haber H. Primary neuroendocrine tumour of the right ventricle presenting with heart failure and cyanosis. *BMJ Case Rep* 2016;2016.
219. Rao PA, Nagendra Prakash SN, Vasudev S, et al. A rare case of right ventricular myxoma causing recurrent stroke. *Indian Heart J* 2016;68 Suppl 2:S97-S101.
220. Schneider AE, Delaney JW, Cabalka AK. Non-infectious thrombosis of the melody((R)) valve: A tale of two cities. *Catheter Cardiovasc Interv* 2016;88:600-4.
221. Singh A, Sharma R, Garg A, et al. Usefulness of bubble study in echocardiographic diagnosis of contained rupture of hydatid cyst in the right ventricular outflow tract. *Echocardiography* 2016;33:1402-8.
222. Zhang HW, Zhong MH, Meng W, Zhang EY, Gu J, Hu J. Intramuscular Lipoma as an Unusual Cause of Right Ventricular Outflow Tract Obstruction. *Echocardiography* 2016;33:328-9.
223. Antonucci ME, Colizzi C, Arlotta G, et al. Dynamic right ventricular outflow obstruction: A rare cause of hypotension during anesthesia induction. *Int J Surg Case Rep* 2017;41:30-2.
224. Joseph G, Chacko ST, Joseph E, Chandra Kumar V. Percutaneous Palliation of Right Ventricular Outflow Tract Obstruction Caused by Metastatic Malignancy. *JACC Cardiovasc Interv* 2017;10:e79-e80.
225. Manmadhan A, Malhotra SP, Weinberg CR, et al. Intimal spindle cell sarcoma masquerading as adult-onset symptomatic pulmonic stenosis: a case report and review of the literature. *J Cardiothorac Surg* 2017;12:93.
226. Padilla-Ibarra J, Rodriguez Zanella H, Cano Zarate R, Alexanderson-Rosas E. An unexpected tumor causing right ventricular obstruction. *Echocardiography* 2017;34:947-8.



227. Privitera F, Monte IP, Indelicato A, Tamburino C. A Membranous Septal Aneurysm Causing Right Ventricular Outflow Tract Obstruction in an Adult. *J Cardiovasc Echogr* 2017;27:145-8.
228. Unosawa S, Osaka S, Arimoto M, Hayashi Y, Kitazumi Y, Tanaka M. Surgical treatment for double-chambered right ventricle in a septuagenarian. *Asian Cardiovasc Thorac Ann* 2017;25:531-3.
229. Verhoeven PA, Learn CP, Brown NM, Goldstein BH. Noninfective Transcatheter Pulmonary Valve Thrombosis: A Rare Cause of Post-Implantation Pulmonary Valve Obstruction. *JACC Cardiovasc Interv* 2017;10:e119-22.
230. Young AM, Danter MR, Lewis JS, Jr., Barton BR. Right Ventricular Hemangioma in the Outflow Tract: A Rare Cause of Obstruction. *Ann Thorac Surg* 2017;103:e245-6.
231. Gangahanumaiah S, Scarr BC, Buckland MR, Pilcher DV, Paraskeva MA, McGiffin DC. Suicide right ventricle after lung transplantation for pulmonary vascular disease. *J Card Surg* 2018;33:412-5.
232. Gendera K, Ewert P, Eicken A. Percutaneous retrieval of a partially flared Melody valve. *Cardiol Young* 2018;28:753-5.
233. Isom N, Rali AS, Damjanov I, Hubbard K, Grigsby J, Gupta K. Right Ventricular Heart Failure from a Cardiac Yolk Sac Tumor. *Am J Case Rep* 2018;19:229-33.
234. Karabag T, Arslan C, Yakisan T, Vatan A, Sak D. Metastatic adenocarcinoma involving the right ventricle and pulmonary artery leading to right heart failure: case report. *Sao Paulo Med J* 2018;136:262-5.
235. Kellermair J, Gitter R, Mair R, Sigler M, Grund M, Steinwender C. First Report of an Acute, Obstructive Thrombosis of a Melody Valve Used for Transcatheter Pulmonary Replacement. *Can J Cardiol* 2018;34:1688.e3-1688.e15.

- 236.** Kocabas U, Zekican G, Vaiz G, Ozbek N, Conkbayir C. Syncope and right-sided heart failure due to right ventricular outflow tract obstruction by giant sinus of Valsalva aneurysm. *Cardiol J* 2018;25:281-2.
- 237.** Tomar M, Bhan A. Rapidly progressing giant aneurysm of right ventricular outflow tract with severe conduit obstruction: Report of two cases. *Images Paediatr Cardiol* 2018;20:1-7.
- 238.** Zheng MJ, Yang J, He GB, Zhou XD, Liu LW. Percutaneous Radiofrequency Ablation of Obstructive Right Ventricular Giant Myxoma. *Ann Thorac Surg* 2018;105:e159-61.
- 239.** Akikwala T, Trivedi D, Kochamba G, et al. Perioperative Evaluation and Surgical Management of a Patient With a Pericardial Hemangioma Abutting the Right Ventricular Outflow Tract and Main Pulmonary Artery. *J Cardiothorac Vasc Anesth* 2019;33:1362-6.
- 240.** Briosa EGA, Dimarco A, Adam R, Haydock P, Flett A. Subtotal Obstruction of the Right Ventricular Outflow Tract Caused by Isolated Intracardiac Renal Cell Carcinoma Metastasis. *Circ Cardiovasc Imaging* 2019;12:e009714.
- 241.** Mohan JC, Baba BA, Mohan V, Shukla M. Isolated right ventricular outflow obstruction: A unique phenotype of hypertrophic cardiomyopathy with review of literature. *IHJ Cardiovascular Case Reports (CVCR)* 2019;3:13-7.
- 242.** Munirathinam GK, Kajal K, Jayant A, Dogra N, Singh H. Epicardial Echocardiography as Rescue Modality for Detection of Dynamic Right Ventricular Outflow Tract Obstruction in Post Pulmonary Valve Stenosis Repair. *A A Pract* 2019;13:396-8.
- 243.** Ramnath NWM, Ozdemir HI, Soliman-Hamad MA. A case of right ventricular outflow tract obstruction after minimally invasive aortic valve replacement. *J Card Surg* 2019;34:626-7.

- 244.** Serban AM, Batrana N, Cocoi M, et al. The role of echocardiography in the diagnosis and management of a giant unruptured sinus of Valsalva aneurysm. *Med Ultrason* 2019;21:194-6.
- 245.** Zhu Y, Cohen JE, Ma M, Woo YJ. Redo Valve-Sparing Root Replacement for Delayed Cusp Derangement From Ventricular Septal Defect. *Ann Thorac Surg* 2019;108:e295-6.
- 246.** Zivkovic I, Micovic S, Kecmanovic V, Krasic S, Milutinovic A, Cirkovic M. Calcified amorphous tumor of the right ventricular outflow tract. *J Card Surg* 2019;34:45-6.
